# Supplementary material for: Role of DEAD-box RNA helicase genes in the growth of Yersinia pseudotuberculosis IP32953 under cold, pH, osmotic, ethanol and oxidative stresses
Source: PLoS One. 2019 Jul 9;14(7):e0219422. doi: 10.1371/journal.pone.0219422 (PMC6615604; doi:10.1371/journal.pone.0219422)
Supplement: S2 Table — (XLSX) [file pone.0219422.s002.xlsx]

## Sheet: Sheet1
Table S2. Optical density values (OD600) of three replicates of Yersinia pseudotuberculosis IP32953 cultures in the non-shocked and cold-shock groups for RT-qPCR.
Timepoint (min)	Temperature (˚C)	OD600 (median)	OD600 (max)	OD600 (min)	Note
0	28	0.008	0.01	0.008
60	28	0.015	0.015	0.015
115	28	0.032	0.033	0.032
180	28	0.086	0.092	0.078
230	28	0.159	0.161	0.159
300	28	0.377	0.406	0.353
360	28	0.651	0.688	0.62
390	28	0.906	0.918	0.88	None-shocked
450	28	1.245	1.261	1.226
490	28	1.871	1.873	1.862
540	28	2.24	2.297	2.168
600	28	2.547	2.608	2.539
390	3	0.643	0.659	0.632	Cold-shock
450	3	0.634	0.645	0.629
490	3	0.62	0.635	0.618
540	3	0.64	0.653	0.608
600	3	0.608	0.639	0.6
