# Supplementary material for: Role of DEAD-box RNA helicase genes in the growth of Yersinia pseudotuberculosis IP32953 under cold, pH, osmotic, ethanol and oxidative stresses
Source: PLoS One. 2019 Jul 9;14(7):e0219422. doi: 10.1371/journal.pone.0219422 (PMC6615604; doi:10.1371/journal.pone.0219422)
Supplement: S7 Table — (XLSX) [file pone.0219422.s007.xlsx]

## Sheet: pH 4.6
Table S7. Optical density values (OD600) of growth of Yersinia pseudotuberculosis IP32953 and mutants ΔrhlB, ΔcsdA, ΔrhlE, ΔdbpA, ΔsrmB under pH 4.6 (with HCl and MES), pH 4.8 (with NaCl and MES), pH 9.0 (with NaOH and TAPS), NaCl 4%, ethanol 3%, H2O2 10mM stresses.
Timepoint (hour)	WT			ΔrhlB (Δyptb0165)			ΔcsdA (Δyptb0486)			ΔrhlE (Δyptb1214)			ΔdbpA (Δyptb1652)			ΔsrmB (Δyptb2900)
	OD600 (median)	OD600 (max)	OD600 (min)	OD600 (median)	OD600 (max)	OD600 (min)	OD600 (median)	OD600 (max)	OD600 (min)	OD600 (median)	OD600 (max)	OD600 (min)	OD600 (median)	OD600 (max)	OD600 (min)	OD600 (median)	OD600 (max)	OD600 (min)
0	0.0125	0.021	0.0115	0.0135	0.0145	0.012	0.0115	0.0125	0.011	0.0125	0.0135	0.0105	0.0115	0.013	0.0065	0.0115	0.014	0.0095
0.25	0.0125	0.0215	0.012	0.014	0.0155	0.013	0.012	0.013	0.0115	0.0125	0.014	0.011	0.0125	0.013	0.006	0.0115	0.0145	0.0095
0.5	0.013	0.022	0.0125	0.015	0.016	0.013	0.013	0.0135	0.0125	0.013	0.0145	0.011	0.013	0.014	0.007	0.0115	0.0145	0.0105
0.75	0.014	0.023	0.0135	0.015	0.017	0.014	0.0135	0.014	0.0125	0.014	0.0155	0.012	0.0135	0.014	0.007	0.0125	0.0155	0.0105
1	0.014	0.023	0.0135	0.015	0.017	0.0145	0.0135	0.0145	0.0125	0.014	0.0155	0.012	0.014	0.0145	0.007	0.0125	0.0155	0.0105
1.25	0.015	0.024	0.0145	0.017	0.0185	0.0155	0.014	0.015	0.014	0.015	0.0165	0.013	0.015	0.0155	0.008	0.014	0.017	0.012
1.5	0.0155	0.0245	0.015	0.017	0.019	0.0155	0.0145	0.0155	0.014	0.016	0.017	0.0135	0.0155	0.016	0.008	0.0135	0.017	0.0115
1.75	0.016	0.025	0.015	0.0175	0.0195	0.016	0.0145	0.0155	0.014	0.016	0.0175	0.014	0.0155	0.0165	0.008	0.014	0.017	0.0125
2	0.017	0.026	0.016	0.018	0.02	0.0175	0.015	0.016	0.0145	0.0165	0.0185	0.014	0.0165	0.017	0.0085	0.0145	0.0175	0.013
2.25	0.017	0.026	0.016	0.019	0.021	0.0175	0.0155	0.0165	0.015	0.0175	0.019	0.015	0.017	0.0175	0.008	0.015	0.0175	0.0135
2.5	0.018	0.027	0.017	0.02	0.022	0.0175	0.0155	0.0165	0.0155	0.018	0.0195	0.0155	0.0175	0.018	0.009	0.0155	0.018	0.0135
2.75	0.0185	0.027	0.0175	0.02	0.0225	0.0185	0.016	0.017	0.0155	0.0185	0.02	0.016	0.018	0.019	0.009	0.016	0.018	0.014
3	0.0195	0.028	0.018	0.021	0.024	0.0195	0.017	0.0175	0.016	0.0195	0.021	0.017	0.019	0.0195	0.01	0.0165	0.019	0.0145
3.25	0.02	0.029	0.019	0.022	0.025	0.02	0.0175	0.0185	0.017	0.02	0.022	0.0175	0.0195	0.0205	0.0105	0.017	0.02	0.0155
3.5	0.021	0.03	0.0205	0.023	0.026	0.0215	0.018	0.019	0.0175	0.021	0.023	0.0185	0.0205	0.0215	0.011	0.0175	0.02	0.016
3.75	0.021	0.03	0.0205	0.0235	0.027	0.0215	0.018	0.019	0.0175	0.0215	0.023	0.0185	0.0205	0.0215	0.011	0.0175	0.02	0.016
4	0.022	0.031	0.021	0.024	0.0275	0.0225	0.019	0.0195	0.0185	0.0225	0.024	0.0195	0.0215	0.0225	0.0115	0.018	0.021	0.0165
4.25	0.023	0.0315	0.021	0.025	0.0285	0.023	0.019	0.02	0.0185	0.023	0.025	0.0205	0.0215	0.023	0.0115	0.018	0.021	0.017
4.5	0.024	0.033	0.022	0.0265	0.0305	0.0245	0.0205	0.021	0.0195	0.024	0.0255	0.0215	0.023	0.0245	0.012	0.019	0.022	0.018
4.75	0.024	0.0335	0.0225	0.027	0.0315	0.025	0.0205	0.021	0.02	0.0245	0.026	0.0215	0.0235	0.0245	0.013	0.019	0.023	0.018
5	0.0255	0.035	0.0235	0.0285	0.0335	0.0265	0.0215	0.0225	0.0215	0.0255	0.0275	0.0235	0.0245	0.0265	0.013	0.0205	0.023	0.019
5.25	0.0265	0.036	0.025	0.03	0.0345	0.0275	0.0225	0.023	0.0215	0.027	0.028	0.0245	0.0255	0.0275	0.014	0.021	0.0235	0.0195
5.5	0.0275	0.037	0.0255	0.031	0.0355	0.029	0.023	0.0235	0.0225	0.028	0.029	0.0255	0.027	0.028	0.0145	0.022	0.0245	0.0205
5.75	0.0285	0.038	0.026	0.0325	0.0355	0.03	0.0235	0.0245	0.023	0.029	0.03	0.0265	0.0275	0.03	0.015	0.0225	0.025	0.0215
6	0.0295	0.039	0.027	0.0335	0.0365	0.031	0.0245	0.0255	0.024	0.03	0.0315	0.0275	0.0285	0.0305	0.015	0.0235	0.026	0.0225
6.25	0.0305	0.039	0.028	0.0345	0.037	0.0315	0.025	0.0255	0.0245	0.0315	0.0325	0.028	0.0295	0.0315	0.0155	0.0245	0.027	0.0225
6.5	0.032	0.0405	0.029	0.0365	0.038	0.034	0.026	0.027	0.0255	0.0325	0.0335	0.0285	0.0305	0.032	0.0165	0.026	0.028	0.0235
6.75	0.034	0.041	0.0305	0.0385	0.0395	0.0355	0.0275	0.028	0.0265	0.0345	0.035	0.0295	0.0325	0.0325	0.0175	0.027	0.029	0.0245
7	0.034	0.0415	0.032	0.0405	0.041	0.0365	0.0285	0.029	0.0275	0.0355	0.0365	0.031	0.033	0.0335	0.018	0.027	0.03	0.025
7.25	0.0355	0.0435	0.033	0.042	0.042	0.0385	0.0295	0.0305	0.0285	0.037	0.0385	0.032	0.0345	0.035	0.019	0.0275	0.031	0.0265
7.5	0.0365	0.0435	0.0345	0.0425	0.044	0.0395	0.03	0.0315	0.0295	0.0385	0.04	0.033	0.035	0.0365	0.019	0.0285	0.032	0.0275
7.75	0.037	0.0445	0.036	0.044	0.046	0.041	0.032	0.033	0.0295	0.0405	0.0415	0.035	0.0365	0.038	0.02	0.03	0.033	0.029
8	0.038	0.046	0.037	0.045	0.047	0.0425	0.0325	0.033	0.031	0.042	0.043	0.036	0.0375	0.0395	0.021	0.0305	0.034	0.0295
8.25	0.0395	0.0475	0.0385	0.046	0.0495	0.0445	0.033	0.035	0.0325	0.044	0.045	0.037	0.039	0.042	0.022	0.0325	0.0355	0.03
8.5	0.041	0.0485	0.04	0.048	0.0515	0.046	0.034	0.037	0.0335	0.0455	0.0465	0.038	0.04	0.0435	0.023	0.034	0.0365	0.031
8.75	0.0425	0.049	0.0405	0.0485	0.053	0.048	0.0355	0.038	0.034	0.048	0.048	0.038	0.041	0.0455	0.024	0.035	0.038	0.032
9	0.0445	0.0505	0.0425	0.0505	0.0555	0.049	0.037	0.04	0.036	0.049	0.0505	0.0405	0.043	0.0475	0.0255	0.037	0.0395	0.033
9.25	0.0465	0.052	0.0435	0.052	0.056	0.0505	0.0385	0.042	0.037	0.051	0.052	0.0415	0.044	0.049	0.027	0.0385	0.041	0.035
9.5	0.047	0.053	0.0445	0.053	0.059	0.052	0.039	0.0435	0.038	0.0525	0.0545	0.043	0.045	0.0505	0.0275	0.0405	0.042	0.035
9.75	0.05	0.055	0.046	0.055	0.0615	0.054	0.041	0.046	0.039	0.054	0.0565	0.0445	0.0465	0.0535	0.0285	0.043	0.0435	0.037
10	0.051	0.056	0.0465	0.056	0.062	0.055	0.042	0.047	0.04	0.056	0.057	0.0445	0.047	0.054	0.029	0.044	0.0445	0.0375
10.25	0.053	0.057	0.0485	0.058	0.0645	0.0565	0.0435	0.049	0.0415	0.058	0.06	0.047	0.0485	0.056	0.0305	0.046	0.0465	0.0385
10.5	0.0545	0.059	0.0495	0.0595	0.066	0.058	0.045	0.0505	0.0425	0.059	0.061	0.0475	0.05	0.0575	0.0305	0.047	0.048	0.0395
10.75	0.0555	0.061	0.0515	0.0615	0.0675	0.06	0.047	0.053	0.044	0.0605	0.0625	0.0495	0.052	0.0595	0.0315	0.0485	0.049	0.0405
11	0.057	0.062	0.052	0.0625	0.0695	0.0605	0.0475	0.0545	0.044	0.062	0.064	0.0495	0.0515	0.0605	0.0325	0.0495	0.0505	0.041
11.25	0.0585	0.0635	0.052	0.0635	0.0705	0.0625	0.049	0.0555	0.046	0.0635	0.0655	0.0515	0.053	0.062	0.0335	0.051	0.052	0.042
11.5	0.0605	0.0655	0.054	0.0645	0.073	0.0635	0.0505	0.058	0.047	0.0645	0.0685	0.053	0.0545	0.064	0.0345	0.0525	0.0535	0.0435
11.75	0.0625	0.0675	0.056	0.067	0.075	0.0655	0.052	0.06	0.0495	0.067	0.07	0.055	0.057	0.066	0.036	0.054	0.0545	0.0455
12	0.0645	0.0685	0.0575	0.0685	0.078	0.0665	0.0535	0.0625	0.051	0.068	0.073	0.0555	0.0575	0.0685	0.0365	0.055	0.0565	0.046
12.25	0.065	0.07	0.058	0.0695	0.0775	0.0675	0.0545	0.0635	0.052	0.07	0.073	0.057	0.059	0.069	0.0375	0.0565	0.058	0.0475
12.5	0.0665	0.072	0.0585	0.0715	0.0795	0.0695	0.0565	0.0655	0.053	0.0715	0.075	0.058	0.06	0.071	0.0385	0.058	0.059	0.0485
12.75	0.068	0.073	0.06	0.073	0.082	0.07	0.058	0.067	0.0535	0.073	0.077	0.0595	0.061	0.072	0.0395	0.059	0.0605	0.05
13	0.0695	0.0745	0.061	0.0745	0.082	0.0715	0.059	0.069	0.0555	0.074	0.0775	0.06	0.0625	0.0735	0.04	0.06	0.062	0.051
13.25	0.071	0.0755	0.062	0.0765	0.084	0.0725	0.0605	0.071	0.0565	0.075	0.0795	0.062	0.0635	0.0745	0.0415	0.0615	0.063	0.0515
13.5	0.072	0.0775	0.063	0.0775	0.086	0.0735	0.062	0.073	0.0575	0.0765	0.081	0.0625	0.0645	0.0765	0.042	0.063	0.064	0.052
13.75	0.073	0.079	0.0635	0.0795	0.088	0.074	0.0635	0.0745	0.059	0.078	0.0825	0.063	0.065	0.0775	0.0435	0.064	0.065	0.0525
14	0.0745	0.0795	0.0645	0.0805	0.0895	0.0755	0.065	0.0765	0.0605	0.079	0.084	0.0645	0.0665	0.0785	0.0445	0.0655	0.0665	0.0535
14.25	0.0755	0.081	0.0655	0.082	0.09	0.076	0.0665	0.078	0.062	0.0805	0.0845	0.066	0.067	0.08	0.0445	0.066	0.0675	0.0545
14.5	0.076	0.082	0.066	0.0835	0.0925	0.0775	0.067	0.08	0.063	0.0815	0.0865	0.0665	0.068	0.082	0.0455	0.067	0.0685	0.0555
14.75	0.0775	0.0825	0.0675	0.0855	0.095	0.078	0.0685	0.082	0.0645	0.0825	0.089	0.068	0.069	0.084	0.0465	0.068	0.07	0.057
15	0.078	0.0835	0.068	0.0865	0.095	0.0795	0.07	0.084	0.0655	0.084	0.0895	0.069	0.07	0.0845	0.048	0.069	0.0705	0.0575
15.25	0.0785	0.0855	0.069	0.0875	0.097	0.0805	0.0705	0.085	0.067	0.0845	0.091	0.069	0.0705	0.086	0.0485	0.0695	0.072	0.058
15.5	0.0795	0.0865	0.069	0.089	0.0985	0.081	0.0715	0.0865	0.068	0.0855	0.092	0.0695	0.071	0.0875	0.049	0.071	0.0725	0.059
15.75	0.08	0.087	0.0695	0.0905	0.0995	0.0815	0.0725	0.0885	0.069	0.0865	0.094	0.0705	0.072	0.089	0.05	0.0715	0.074	0.0595
16	0.0815	0.088	0.0705	0.0915	0.101	0.0825	0.0735	0.09	0.07	0.088	0.095	0.0715	0.0735	0.09	0.0505	0.072	0.075	0.0605
16.25	0.0825	0.0895	0.071	0.093	0.103	0.084	0.075	0.091	0.071	0.0885	0.096	0.0725	0.074	0.091	0.0515	0.0725	0.0755	0.061
16.5	0.083	0.09	0.072	0.093	0.105	0.0845	0.076	0.093	0.072	0.0885	0.098	0.0735	0.075	0.0925	0.0525	0.073	0.0775	0.0615
16.75	0.0835	0.0905	0.0725	0.095	0.1055	0.085	0.0765	0.0945	0.073	0.09	0.0995	0.0735	0.0755	0.0935	0.0535	0.0735	0.078	0.0625
17	0.084	0.0915	0.0725	0.096	0.108	0.086	0.077	0.0965	0.0735	0.0905	0.101	0.0745	0.0765	0.0955	0.0545	0.074	0.079	0.0625
17.25	0.085	0.093	0.0745	0.097	0.11	0.087	0.079	0.098	0.0755	0.0915	0.103	0.0755	0.0765	0.0965	0.0555	0.075	0.081	0.064
17.5	0.0855	0.093	0.0745	0.0985	0.1125	0.0875	0.0795	0.099	0.0755	0.092	0.1045	0.076	0.0775	0.0975	0.0555	0.0755	0.0815	0.064
17.75	0.086	0.0945	0.0745	0.099	0.112	0.0885	0.0805	0.1	0.076	0.0925	0.104	0.0765	0.0775	0.0975	0.056	0.0765	0.0815	0.064
18	0.087	0.095	0.075	0.1005	0.1145	0.0885	0.081	0.102	0.077	0.0935	0.1065	0.0775	0.0785	0.0995	0.0565	0.077	0.083	0.0645
18.25	0.087	0.0965	0.0765	0.102	0.116	0.09	0.0825	0.104	0.078	0.094	0.1075	0.0775	0.079	0.1005	0.0575	0.0775	0.0845	0.065
18.5	0.0875	0.098	0.076	0.103	0.1175	0.091	0.083	0.106	0.0785	0.096	0.109	0.0785	0.0795	0.102	0.0575	0.079	0.085	0.0655
18.75	0.0885	0.0985	0.077	0.104	0.1185	0.0915	0.0835	0.1065	0.0795	0.0955	0.11	0.079	0.0805	0.1025	0.0585	0.079	0.086	0.067
19	0.089	0.099	0.077	0.1045	0.12	0.092	0.0845	0.1075	0.08	0.097	0.1115	0.0795	0.0805	0.1035	0.059	0.0795	0.0865	0.067
19.25	0.0895	0.1005	0.0775	0.105	0.1215	0.0935	0.0855	0.1085	0.081	0.097	0.112	0.08	0.0815	0.105	0.06	0.08	0.0875	0.067
19.5	0.09	0.102	0.078	0.1065	0.124	0.0945	0.0855	0.1105	0.0815	0.0975	0.115	0.081	0.082	0.1065	0.06	0.08	0.089	0.068
19.75	0.0905	0.1025	0.079	0.1075	0.125	0.0945	0.0865	0.1115	0.082	0.0985	0.115	0.081	0.0825	0.107	0.061	0.0805	0.0895	0.0685
20	0.091	0.103	0.0795	0.1085	0.126	0.0945	0.087	0.113	0.0825	0.099	0.1165	0.0815	0.083	0.1075	0.0615	0.081	0.0905	0.0685
20.25	0.0915	0.1035	0.0795	0.1095	0.127	0.0955	0.0875	0.113	0.0825	0.0995	0.117	0.082	0.083	0.1085	0.062	0.0815	0.0905	0.069
20.5	0.0915	0.1045	0.0795	0.11	0.1285	0.0965	0.088	0.115	0.0835	0.1	0.1185	0.0825	0.0835	0.1095	0.062	0.082	0.0915	0.0695
20.75	0.0925	0.1055	0.08	0.112	0.13	0.0965	0.0895	0.116	0.0845	0.1005	0.1205	0.084	0.0845	0.111	0.0625	0.083	0.093	0.07
21	0.0925	0.106	0.0795	0.1115	0.1305	0.0975	0.0895	0.1165	0.084	0.1005	0.121	0.0835	0.0845	0.1115	0.063	0.0825	0.0935	0.07
21.25	0.0935	0.108	0.081	0.1135	0.133	0.098	0.09	0.118	0.0855	0.102	0.1225	0.084	0.085	0.113	0.063	0.0835	0.095	0.0705
21.5	0.094	0.108	0.0815	0.1135	0.1335	0.099	0.0905	0.119	0.0855	0.1015	0.1235	0.0845	0.0855	0.113	0.064	0.0835	0.095	0.0705
21.75	0.0945	0.1105	0.0815	0.1145	0.136	0.099	0.091	0.1205	0.0855	0.1025	0.1265	0.0845	0.086	0.1155	0.064	0.0845	0.0965	0.071
22	0.0945	0.1095	0.0815	0.116	0.136	0.0995	0.092	0.1205	0.086	0.104	0.1255	0.0855	0.086	0.115	0.064	0.085	0.0965	0.071
22.25	0.096	0.111	0.0825	0.116	0.138	0.101	0.0925	0.122	0.0865	0.1035	0.1275	0.085	0.0875	0.1165	0.065	0.0855	0.098	0.0715
22.5	0.096	0.111	0.0825	0.1175	0.1375	0.101	0.0925	0.1215	0.0865	0.1045	0.1275	0.0855	0.088	0.116	0.065	0.086	0.098	0.0715
22.75	0.096	0.113	0.0825	0.1175	0.14	0.1015	0.0925	0.123	0.0875	0.1045	0.129	0.0855	0.0875	0.118	0.065	0.0855	0.0995	0.072
23	0.0975	0.1135	0.083	0.119	0.141	0.1025	0.094	0.1235	0.088	0.1055	0.1305	0.0865	0.0895	0.1185	0.066	0.087	0.0995	0.073
23.25	0.097	0.1145	0.0835	0.1175	0.142	0.1025	0.0945	0.1245	0.088	0.105	0.1315	0.0865	0.0895	0.1195	0.066	0.0865	0.101	0.073
23.5	0.0975	0.1155	0.084	0.1195	0.1445	0.103	0.095	0.126	0.0885	0.1065	0.1335	0.0865	0.0895	0.121	0.067	0.087	0.102	0.074
23.75	0.098	0.116	0.084	0.1205	0.145	0.104	0.095	0.127	0.0895	0.1075	0.135	0.0875	0.09	0.1215	0.067	0.088	0.1025	0.0735
24	0.0975	0.1165	0.0845	0.1215	0.1455	0.105	0.0955	0.127	0.09	0.107	0.1345	0.088	0.09	0.1225	0.067	0.088	0.1025	0.075
24.25	0.0985	0.117	0.0845	0.122	0.1465	0.1055	0.0965	0.1285	0.09	0.108	0.136	0.0875	0.0905	0.123	0.068	0.0885	0.103	0.074
24.5	0.099	0.1175	0.085	0.1225	0.1475	0.1055	0.0965	0.129	0.09	0.108	0.1365	0.088	0.0905	0.1235	0.068	0.089	0.1035	0.075
24.75	0.0995	0.118	0.0855	0.1235	0.1485	0.1065	0.0975	0.129	0.0905	0.109	0.1375	0.088	0.0915	0.1245	0.068	0.0895	0.104	0.075
25	0.1	0.118	0.0855	0.1235	0.148	0.1065	0.0975	0.1295	0.091	0.109	0.1375	0.0885	0.0915	0.125	0.068	0.09	0.104	0.075
25.25	0.1	0.12	0.0855	0.1245	0.15	0.107	0.0975	0.131	0.0915	0.1095	0.1395	0.0885	0.092	0.1265	0.069	0.0905	0.106	0.075
25.5	0.101	0.1205	0.086	0.125	0.151	0.1075	0.099	0.1315	0.0915	0.11	0.1405	0.0885	0.093	0.127	0.069	0.0905	0.107	0.0755
25.75	0.1015	0.122	0.0865	0.126	0.1525	0.108	0.099	0.1325	0.0925	0.1105	0.142	0.0895	0.093	0.1285	0.0695	0.091	0.108	0.076
26	0.102	0.1225	0.0865	0.126	0.153	0.1085	0.0995	0.1325	0.0925	0.111	0.143	0.0895	0.094	0.129	0.07	0.092	0.1085	0.076
26.25	0.1025	0.123	0.088	0.1265	0.154	0.1095	0.1	0.1335	0.093	0.1115	0.144	0.09	0.094	0.13	0.0705	0.092	0.1095	0.077
26.5	0.1025	0.1235	0.088	0.127	0.1555	0.1095	0.0995	0.134	0.093	0.1125	0.1445	0.09	0.0945	0.13	0.0705	0.092	0.109	0.077
26.75	0.1025	0.123	0.0875	0.127	0.154	0.1095	0.1	0.1335	0.093	0.1115	0.144	0.0895	0.094	0.1295	0.0705	0.092	0.109	0.0765
27	0.103	0.1245	0.0885	0.127	0.1565	0.11	0.1	0.1345	0.0935	0.111	0.146	0.09	0.095	0.131	0.0715	0.092	0.1105	0.077
27.25	0.1035	0.125	0.0885	0.1275	0.157	0.11	0.1005	0.135	0.094	0.112	0.1465	0.0905	0.0955	0.132	0.071	0.0925	0.111	0.077
27.5	0.104	0.1265	0.089	0.1285	0.1595	0.1115	0.1015	0.1365	0.0945	0.1125	0.1485	0.0905	0.0955	0.134	0.072	0.093	0.113	0.0775
27.75	0.1045	0.1255	0.089	0.129	0.158	0.1115	0.101	0.1355	0.095	0.1125	0.1475	0.0915	0.096	0.1325	0.0715	0.094	0.1115	0.0775
28	0.1045	0.1265	0.089	0.129	0.1585	0.112	0.1015	0.1365	0.095	0.113	0.148	0.091	0.0965	0.133	0.0725	0.0935	0.112	0.078

## Sheet: pH 4.8
Timepoint (hour)	WT			ΔrhlB (Δyptb0165)			ΔcsdA (Δyptb0486)			ΔrhlE (Δyptb1214)			ΔdbpA (Δyptb1652)			ΔsrmB (Δyptb2900)
	OD600 (median)	OD600 (max)	OD600 (min)	OD600 (median)	OD600 (max)	OD600 (min)	OD600 (median)	OD600 (max)	OD600 (min)	OD600 (median)	OD600 (max)	OD600 (min)	OD600 (median)	OD600 (max)	OD600 (min)	OD600 (median)	OD600 (max)	OD600 (min)
0	0.0125	0.013	0.0115	0.015	0.0165	0.013	0.012	0.013	0.012	0.014	0.0315	0.0135	0.013	0.0235	0.013	0.0125	0.0235	0.012
0.25	0.0135	0.0145	0.012	0.017	0.0175	0.0145	0.013	0.014	0.013	0.015	0.016	0.013	0.014	0.0145	0.0135	0.013	0.0135	0.012
0.5	0.0145	0.015	0.013	0.018	0.019	0.0155	0.014	0.015	0.0135	0.016	0.017	0.014	0.015	0.0155	0.0145	0.014	0.0145	0.013
0.75	0.0155	0.016	0.0135	0.0185	0.02	0.016	0.014	0.015	0.014	0.0165	0.018	0.0145	0.016	0.0165	0.015	0.0145	0.015	0.014
1	0.0165	0.018	0.015	0.0205	0.022	0.018	0.0155	0.016	0.015	0.018	0.019	0.016	0.017	0.018	0.016	0.0155	0.0155	0.015
1.25	0.0175	0.0185	0.016	0.022	0.0235	0.019	0.016	0.0175	0.0155	0.019	0.02	0.017	0.018	0.0185	0.017	0.0165	0.0165	0.015
1.5	0.018	0.0195	0.0165	0.0235	0.025	0.0205	0.017	0.017	0.016	0.02	0.021	0.018	0.019	0.0195	0.018	0.0165	0.017	0.016
1.75	0.019	0.0205	0.018	0.025	0.0265	0.0215	0.018	0.0185	0.017	0.021	0.023	0.019	0.02	0.021	0.0195	0.0175	0.0185	0.017
2	0.0205	0.0215	0.019	0.027	0.0285	0.023	0.0185	0.0195	0.018	0.0225	0.0245	0.02	0.021	0.0215	0.02	0.0185	0.019	0.0175
2.25	0.022	0.023	0.02	0.0285	0.031	0.025	0.0195	0.02	0.019	0.024	0.0255	0.0215	0.023	0.024	0.021	0.0195	0.0205	0.018
2.5	0.0225	0.0245	0.0215	0.03	0.0335	0.0265	0.02	0.021	0.02	0.0255	0.0275	0.023	0.024	0.025	0.022	0.02	0.021	0.019
2.75	0.025	0.0265	0.023	0.0325	0.036	0.029	0.022	0.0225	0.0215	0.028	0.029	0.0245	0.0255	0.027	0.024	0.021	0.022	0.0205
3	0.026	0.028	0.0245	0.0355	0.0385	0.0305	0.023	0.024	0.0225	0.0295	0.031	0.0265	0.027	0.028	0.0255	0.0225	0.0235	0.0215
3.25	0.028	0.03	0.0265	0.0375	0.0405	0.0335	0.0245	0.0255	0.0235	0.031	0.0325	0.028	0.0295	0.03	0.027	0.0235	0.025	0.023
3.5	0.0295	0.031	0.027	0.04	0.042	0.035	0.0255	0.026	0.0245	0.0325	0.0345	0.0295	0.03	0.0325	0.029	0.025	0.0255	0.0235
3.75	0.031	0.034	0.0285	0.042	0.044	0.0375	0.0275	0.0275	0.0255	0.035	0.037	0.032	0.033	0.0345	0.0305	0.025	0.027	0.0245
4	0.032	0.035	0.0305	0.044	0.0485	0.039	0.0285	0.029	0.027	0.0365	0.04	0.0335	0.0345	0.036	0.032	0.0265	0.028	0.0255
4.25	0.035	0.038	0.0335	0.046	0.052	0.0425	0.03	0.031	0.0295	0.039	0.043	0.036	0.0365	0.0385	0.034	0.0285	0.0295	0.0275
4.5	0.037	0.0385	0.0355	0.0485	0.056	0.043	0.0315	0.0325	0.031	0.0415	0.0455	0.038	0.0385	0.041	0.036	0.029	0.0315	0.0285
4.75	0.0395	0.041	0.0385	0.052	0.0595	0.045	0.034	0.0355	0.0325	0.0455	0.0495	0.0405	0.0405	0.044	0.0385	0.032	0.033	0.0305
5	0.042	0.0435	0.0405	0.0545	0.063	0.047	0.036	0.037	0.035	0.049	0.0515	0.0415	0.0425	0.0465	0.0405	0.0335	0.0345	0.0325
5.25	0.0445	0.0465	0.042	0.0575	0.066	0.05	0.0385	0.0395	0.0365	0.053	0.055	0.043	0.0445	0.049	0.043	0.0355	0.0365	0.0345
5.5	0.048	0.0505	0.0445	0.0615	0.071	0.052	0.04	0.042	0.039	0.0565	0.059	0.045	0.0475	0.0525	0.045	0.0375	0.0385	0.0365
5.75	0.0495	0.053	0.047	0.065	0.0735	0.0555	0.0425	0.045	0.04	0.0605	0.0615	0.0475	0.05	0.0545	0.0475	0.0395	0.0405	0.039
6	0.053	0.056	0.049	0.069	0.0775	0.058	0.045	0.048	0.0415	0.0645	0.065	0.05	0.052	0.0575	0.0495	0.0415	0.043	0.041
6.25	0.0565	0.059	0.0495	0.0725	0.081	0.061	0.047	0.052	0.0445	0.068	0.0685	0.052	0.0565	0.0615	0.0515	0.044	0.045	0.043
6.5	0.0595	0.0625	0.052	0.0765	0.0855	0.0635	0.049	0.055	0.0465	0.0715	0.0725	0.055	0.059	0.0645	0.054	0.0465	0.0475	0.045
6.75	0.0625	0.0655	0.0545	0.08	0.089	0.066	0.0515	0.058	0.0485	0.0745	0.0755	0.058	0.062	0.0675	0.056	0.049	0.0495	0.0475
7	0.0655	0.0695	0.057	0.083	0.091	0.0695	0.0545	0.0615	0.051	0.078	0.0795	0.06	0.064	0.0705	0.058	0.051	0.052	0.049
7.25	0.0685	0.0725	0.059	0.0855	0.0945	0.0725	0.0565	0.0645	0.0535	0.0805	0.0835	0.0625	0.067	0.073	0.06	0.0535	0.055	0.0505
7.5	0.0715	0.075	0.0615	0.087	0.0965	0.075	0.0595	0.0675	0.0565	0.084	0.087	0.0645	0.071	0.0765	0.0625	0.0565	0.0575	0.053
7.75	0.0745	0.0785	0.0645	0.089	0.099	0.0775	0.0615	0.0715	0.058	0.087	0.0895	0.0675	0.0735	0.08	0.065	0.0585	0.06	0.0555
8	0.0785	0.0825	0.0675	0.0925	0.102	0.0795	0.0645	0.075	0.0615	0.09	0.0925	0.071	0.076	0.083	0.068	0.061	0.0625	0.058
8.25	0.0815	0.0845	0.07	0.0945	0.104	0.0815	0.0675	0.0785	0.063	0.092	0.0955	0.0735	0.08	0.085	0.0705	0.064	0.0655	0.0605
8.5	0.083	0.088	0.072	0.096	0.107	0.0835	0.07	0.0815	0.0655	0.0955	0.099	0.0765	0.0825	0.087	0.0725	0.0665	0.068	0.0615
8.75	0.0865	0.09	0.075	0.0995	0.11	0.087	0.073	0.0845	0.0695	0.0975	0.1015	0.079	0.0855	0.09	0.0745	0.069	0.0705	0.064
9	0.089	0.093	0.077	0.103	0.113	0.089	0.0755	0.088	0.072	0.1005	0.104	0.0815	0.088	0.092	0.0775	0.0715	0.0735	0.066
9.25	0.0905	0.095	0.079	0.1055	0.115	0.0905	0.078	0.091	0.0745	0.102	0.1065	0.082	0.09	0.094	0.0795	0.074	0.0755	0.068
9.5	0.093	0.098	0.0815	0.1095	0.1185	0.0945	0.081	0.094	0.0775	0.106	0.111	0.0845	0.0935	0.097	0.082	0.0765	0.0795	0.07
9.75	0.0955	0.1	0.0825	0.111	0.121	0.0965	0.083	0.097	0.077	0.108	0.1115	0.0865	0.094	0.099	0.0835	0.0785	0.0795	0.0715
10	0.098	0.1025	0.085	0.114	0.1225	0.0995	0.085	0.099	0.0805	0.1105	0.116	0.0885	0.098	0.102	0.0855	0.08	0.0825	0.073
10.25	0.1015	0.1055	0.087	0.117	0.125	0.102	0.087	0.102	0.0825	0.1135	0.118	0.0915	0.1	0.1045	0.0875	0.082	0.084	0.075
10.5	0.1025	0.108	0.09	0.1175	0.128	0.105	0.089	0.1045	0.0845	0.1155	0.1205	0.093	0.1015	0.1065	0.09	0.0845	0.086	0.0765
10.75	0.1045	0.11	0.091	0.1205	0.129	0.1045	0.09	0.106	0.085	0.1175	0.1235	0.096	0.105	0.109	0.091	0.0855	0.0885	0.0775
11	0.1075	0.1125	0.0935	0.1225	0.132	0.1075	0.092	0.109	0.0875	0.12	0.125	0.099	0.1065	0.111	0.0945	0.0875	0.0905	0.0795
11.25	0.11	0.114	0.095	0.125	0.134	0.1095	0.0945	0.111	0.0895	0.1225	0.1285	0.101	0.1095	0.1135	0.0965	0.089	0.0935	0.081
11.5	0.112	0.1175	0.0985	0.128	0.1365	0.113	0.0975	0.114	0.092	0.1245	0.1315	0.1035	0.1115	0.115	0.0995	0.0915	0.0955	0.0825
11.75	0.114	0.118	0.1005	0.13	0.1395	0.1155	0.099	0.116	0.0945	0.1265	0.134	0.106	0.1145	0.117	0.1005	0.094	0.0985	0.0845
12	0.117	0.12	0.102	0.133	0.1415	0.1175	0.1005	0.117	0.0955	0.129	0.136	0.1085	0.1155	0.12	0.103	0.095	0.099	0.0855
12.25	0.12	0.122	0.1045	0.1345	0.145	0.12	0.1015	0.1205	0.098	0.132	0.1385	0.1115	0.118	0.1225	0.106	0.0975	0.101	0.0875
12.5	0.122	0.125	0.106	0.138	0.1465	0.122	0.1045	0.122	0.1	0.1335	0.142	0.1125	0.121	0.124	0.108	0.099	0.1045	0.089
12.75	0.1235	0.1275	0.107	0.1395	0.1495	0.1245	0.1065	0.1245	0.102	0.136	0.1435	0.1145	0.1215	0.127	0.109	0.1005	0.104	0.0905
13	0.126	0.1295	0.1095	0.143	0.1535	0.1265	0.1095	0.127	0.104	0.1385	0.1455	0.117	0.124	0.129	0.112	0.103	0.107	0.0915
13.25	0.1285	0.1315	0.1115	0.145	0.1555	0.1285	0.11	0.128	0.106	0.14	0.149	0.119	0.1265	0.131	0.115	0.1045	0.1095	0.093
13.5	0.131	0.134	0.1135	0.148	0.157	0.1295	0.1125	0.13	0.1065	0.142	0.152	0.1215	0.1285	0.133	0.117	0.106	0.1115	0.095
13.75	0.133	0.135	0.1155	0.1505	0.1605	0.131	0.1135	0.133	0.1085	0.1445	0.154	0.124	0.1295	0.135	0.119	0.1075	0.1125	0.0965
14	0.136	0.138	0.118	0.1515	0.1635	0.135	0.116	0.135	0.111	0.1475	0.1565	0.1255	0.1325	0.1375	0.121	0.109	0.1145	0.098
14.25	0.1375	0.1395	0.1205	0.154	0.164	0.138	0.1175	0.1365	0.112	0.149	0.159	0.1265	0.135	0.14	0.1235	0.1105	0.1175	0.099
14.5	0.1395	0.142	0.1235	0.1565	0.1685	0.1405	0.119	0.139	0.115	0.152	0.162	0.13	0.1385	0.1425	0.1255	0.1125	0.12	0.101
14.75	0.1435	0.1455	0.1265	0.1585	0.171	0.144	0.1215	0.141	0.117	0.154	0.1645	0.1315	0.1395	0.145	0.129	0.1145	0.122	0.1025
15	0.145	0.1475	0.128	0.163	0.1735	0.146	0.1235	0.144	0.118	0.156	0.167	0.1335	0.142	0.1475	0.131	0.116	0.1245	0.104
15.25	0.1475	0.1495	0.13	0.165	0.1755	0.148	0.1265	0.145	0.1195	0.1595	0.1705	0.137	0.144	0.149	0.1325	0.118	0.1265	0.105
15.5	0.15	0.1515	0.1315	0.166	0.179	0.1505	0.1285	0.1485	0.1205	0.161	0.174	0.139	0.147	0.1515	0.135	0.12	0.128	0.1075
15.75	0.152	0.1535	0.133	0.167	0.1815	0.152	0.1305	0.149	0.123	0.1645	0.1755	0.141	0.1485	0.1535	0.1365	0.1215	0.13	0.1085
16	0.1545	0.156	0.1355	0.17	0.1825	0.155	0.1325	0.1515	0.126	0.166	0.177	0.143	0.151	0.156	0.139	0.123	0.1315	0.1095
16.25	0.1565	0.158	0.1385	0.172	0.186	0.156	0.1325	0.1535	0.1275	0.1685	0.1805	0.145	0.154	0.1585	0.142	0.125	0.1345	0.111
16.5	0.1595	0.161	0.14	0.176	0.1885	0.159	0.1355	0.1565	0.1285	0.1695	0.184	0.148	0.1555	0.1615	0.144	0.1265	0.136	0.113
16.75	0.161	0.163	0.1415	0.177	0.1915	0.1595	0.137	0.158	0.13	0.172	0.186	0.149	0.158	0.163	0.146	0.1285	0.139	0.1145
17	0.164	0.165	0.144	0.18	0.193	0.165	0.139	0.1605	0.1325	0.1735	0.1895	0.152	0.161	0.166	0.1485	0.13	0.141	0.1165
17.25	0.1655	0.1675	0.146	0.1815	0.1955	0.1655	0.1405	0.162	0.1335	0.1765	0.192	0.1535	0.1635	0.1675	0.151	0.1315	0.143	0.1175
17.5	0.1675	0.1685	0.147	0.1845	0.198	0.168	0.144	0.1645	0.1355	0.179	0.1935	0.155	0.1645	0.1685	0.153	0.1335	0.144	0.118
17.75	0.169	0.171	0.1505	0.185	0.2015	0.17	0.1455	0.1675	0.1385	0.181	0.1965	0.1575	0.168	0.1715	0.1555	0.1355	0.1465	0.12
18	0.172	0.1735	0.1515	0.1885	0.2025	0.1735	0.1475	0.1695	0.1385	0.1835	0.1995	0.16	0.17	0.1735	0.157	0.1365	0.149	0.121
18.25	0.1725	0.1755	0.153	0.1895	0.205	0.1745	0.1505	0.172	0.1405	0.1865	0.202	0.1605	0.173	0.175	0.1585	0.1385	0.151	0.122
18.5	0.175	0.1775	0.1555	0.191	0.206	0.1765	0.153	0.1735	0.1415	0.188	0.2045	0.1635	0.174	0.1775	0.161	0.1395	0.153	0.124
18.75	0.178	0.18	0.157	0.194	0.209	0.179	0.1545	0.1765	0.1445	0.189	0.2065	0.1665	0.177	0.1795	0.163	0.141	0.1545	0.1255
19	0.1795	0.1825	0.16	0.198	0.2115	0.1815	0.1565	0.1775	0.147	0.193	0.209	0.168	0.179	0.181	0.166	0.143	0.1565	0.1265
19.25	0.182	0.1845	0.161	0.1985	0.214	0.183	0.1585	0.18	0.1485	0.1945	0.212	0.169	0.182	0.1835	0.168	0.145	0.1595	0.128
19.5	0.1835	0.187	0.1625	0.2005	0.2145	0.186	0.16	0.181	0.149	0.1965	0.213	0.172	0.183	0.186	0.17	0.1465	0.1605	0.129
19.75	0.1845	0.189	0.165	0.2035	0.2165	0.1885	0.161	0.1835	0.1525	0.197	0.215	0.1735	0.184	0.1875	0.1715	0.147	0.162	0.131
20	0.187	0.192	0.1665	0.2045	0.2205	0.1905	0.1625	0.1865	0.1545	0.1995	0.2165	0.1755	0.1865	0.1895	0.1735	0.148	0.1635	0.132
20.25	0.189	0.194	0.168	0.2065	0.221	0.193	0.1655	0.1885	0.155	0.2025	0.22	0.178	0.1885	0.191	0.175	0.15	0.1655	0.133
20.5	0.191	0.1965	0.1705	0.2085	0.224	0.196	0.168	0.191	0.1565	0.2035	0.2225	0.1795	0.192	0.193	0.1775	0.1515	0.1675	0.1345
20.75	0.192	0.1985	0.172	0.212	0.225	0.1965	0.17	0.192	0.1585	0.206	0.2245	0.1815	0.1925	0.195	0.1785	0.152	0.1695	0.135
21	0.195	0.2005	0.1735	0.2145	0.2275	0.2005	0.1715	0.195	0.161	0.2075	0.2265	0.184	0.1955	0.1975	0.1805	0.1545	0.1715	0.1365
21.25	0.197	0.202	0.176	0.2155	0.23	0.2025	0.174	0.198	0.1625	0.2095	0.229	0.1855	0.198	0.199	0.183	0.156	0.174	0.1375
21.5	0.198	0.205	0.178	0.217	0.2335	0.2045	0.176	0.1995	0.1655	0.2115	0.2305	0.1875	0.1995	0.2005	0.185	0.157	0.1755	0.138
21.75	0.1995	0.2065	0.1795	0.219	0.235	0.206	0.178	0.2025	0.167	0.212	0.232	0.189	0.201	0.201	0.186	0.1585	0.1755	0.14
22	0.202	0.2095	0.1815	0.2235	0.2365	0.2085	0.1795	0.2045	0.1685	0.2145	0.236	0.1915	0.2025	0.2035	0.189	0.1595	0.1775	0.141
22.25	0.2035	0.2125	0.1825	0.225	0.239	0.2105	0.181	0.207	0.1705	0.217	0.2365	0.1935	0.2045	0.205	0.191	0.1615	0.178	0.142
22.5	0.205	0.213	0.1855	0.227	0.2395	0.2135	0.184	0.209	0.1715	0.2205	0.2385	0.1945	0.2065	0.2075	0.1935	0.163	0.1815	0.144
22.75	0.208	0.2155	0.187	0.2305	0.242	0.2155	0.1855	0.211	0.175	0.222	0.2405	0.1975	0.209	0.21	0.1965	0.1635	0.183	0.1445
23	0.209	0.217	0.1895	0.231	0.244	0.2175	0.187	0.2135	0.1755	0.2225	0.2425	0.199	0.211	0.2115	0.1975	0.165	0.1845	0.146
23.25	0.211	0.22	0.1915	0.235	0.2465	0.2205	0.1895	0.2155	0.178	0.2255	0.245	0.2015	0.213	0.214	0.2	0.1655	0.1865	0.1465
23.5	0.213	0.2225	0.1925	0.2365	0.2485	0.2205	0.191	0.2175	0.179	0.227	0.2475	0.2035	0.214	0.216	0.202	0.1675	0.1885	0.149
23.75	0.215	0.224	0.194	0.2385	0.2535	0.224	0.1945	0.22	0.1815	0.228	0.2505	0.2055	0.2165	0.2175	0.204	0.169	0.189	0.1505
24	0.217	0.2255	0.195	0.242	0.253	0.2255	0.196	0.2215	0.1835	0.228	0.2515	0.2065	0.218	0.2185	0.2045	0.17	0.1895	0.1515
24.25	0.218	0.228	0.1975	0.242	0.255	0.2275	0.198	0.223	0.1855	0.2315	0.253	0.2095	0.221	0.221	0.207	0.1715	0.192	0.1525
24.5	0.2195	0.23	0.2	0.2445	0.258	0.2285	0.1995	0.2275	0.1875	0.234	0.254	0.211	0.2225	0.223	0.2095	0.173	0.1925	0.1535
24.75	0.222	0.2315	0.2005	0.247	0.259	0.231	0.202	0.229	0.1875	0.2365	0.2565	0.2125	0.2235	0.224	0.21	0.1745	0.193	0.1545
25	0.224	0.2335	0.203	0.248	0.261	0.234	0.203	0.231	0.191	0.2355	0.258	0.214	0.2255	0.2275	0.2125	0.176	0.1965	0.1545
25.25	0.226	0.236	0.205	0.251	0.2645	0.237	0.206	0.2325	0.1925	0.239	0.2625	0.2175	0.2285	0.2295	0.2145	0.178	0.1985	0.157
25.5	0.228	0.238	0.2065	0.2535	0.2655	0.2385	0.208	0.2365	0.1945	0.242	0.264	0.2195	0.229	0.232	0.2165	0.179	0.1995	0.158
25.75	0.2295	0.241	0.2095	0.2555	0.2695	0.2415	0.2095	0.238	0.1965	0.2435	0.265	0.2215	0.23	0.2345	0.219	0.18	0.202	0.159
26	0.2315	0.243	0.2105	0.258	0.2705	0.2435	0.2125	0.2405	0.1985	0.246	0.268	0.223	0.234	0.237	0.2205	0.1815	0.2025	0.161
26.25	0.2335	0.2455	0.2115	0.2595	0.2735	0.2455	0.214	0.2425	0.1995	0.248	0.2695	0.2255	0.235	0.2385	0.222	0.183	0.2035	0.161
26.5	0.235	0.247	0.214	0.2615	0.275	0.247	0.2165	0.245	0.2015	0.25	0.2705	0.2275	0.236	0.24	0.2235	0.184	0.2045	0.1625
26.75	0.237	0.2495	0.2155	0.266	0.276	0.2505	0.2185	0.2465	0.2025	0.251	0.2735	0.228	0.2395	0.2435	0.2265	0.1855	0.207	0.1635
27	0.2395	0.251	0.218	0.267	0.281	0.2515	0.2195	0.2485	0.205	0.253	0.277	0.23	0.2395	0.245	0.228	0.1865	0.208	0.1645
27.25	0.242	0.254	0.219	0.268	0.282	0.2535	0.2225	0.2505	0.2075	0.255	0.2805	0.2335	0.2425	0.247	0.229	0.1885	0.2115	0.166
27.5	0.243	0.2565	0.2205	0.2705	0.2845	0.255	0.2245	0.253	0.209	0.2575	0.281	0.233	0.244	0.249	0.2305	0.1895	0.21	0.1675
27.75	0.245	0.2585	0.223	0.273	0.2875	0.257	0.2275	0.255	0.2115	0.261	0.2825	0.236	0.246	0.2525	0.233	0.191	0.212	0.1685
28	0.247	0.261	0.2245	0.2755	0.29	0.2595	0.23	0.258	0.213	0.263	0.285	0.238	0.2485	0.2535	0.2345	0.1925	0.2135	0.17

## Sheet: pH 9.0
Timepoint (hour)	WT			ΔrhlB (Δyptb0165)			ΔcsdA (Δyptb0486)			ΔrhlE (Δyptb1214)			ΔdbpA (Δyptb1652)			ΔsrmB (Δyptb2900)
	OD600 (median)	OD600 (max)	OD600 (min)	OD600 (median)	OD600 (max)	OD600 (min)	OD600 (median)	OD600 (max)	OD600 (min)	OD600 (median)	OD600 (max)	OD600 (min)	OD600 (median)	OD600 (max)	OD600 (min)	OD600 (median)	OD600 (max)	OD600 (min)
0	0.013	0.014	0.011	0.0125	0.0135	0.012	0.0135	0.015	0.0125	0.011	0.013	0.0105	0.012	0.0135	0.011	0.0115	0.013	0.0105
0.25	0.014	0.015	0.0125	0.0135	0.0145	0.013	0.015	0.0165	0.014	0.012	0.014	0.012	0.013	0.0145	0.0125	0.013	0.0145	0.012
0.5	0.015	0.016	0.013	0.015	0.0165	0.014	0.0165	0.0185	0.0155	0.0135	0.0145	0.013	0.014	0.015	0.0135	0.0135	0.016	0.0125
0.75	0.017	0.018	0.014	0.016	0.0175	0.016	0.0185	0.02	0.017	0.0145	0.0155	0.014	0.015	0.016	0.014	0.0155	0.017	0.014
1	0.0175	0.019	0.015	0.0175	0.0195	0.017	0.02	0.0215	0.0185	0.016	0.0175	0.015	0.0165	0.018	0.0155	0.0165	0.0185	0.0155
1.25	0.018	0.0205	0.0165	0.019	0.0205	0.0185	0.0215	0.023	0.0195	0.0175	0.0185	0.016	0.018	0.019	0.0165	0.018	0.02	0.016
1.5	0.02	0.022	0.0175	0.0205	0.0225	0.02	0.0235	0.025	0.0215	0.0185	0.0195	0.018	0.019	0.0205	0.0175	0.0185	0.0215	0.0175
1.75	0.0205	0.023	0.0185	0.022	0.0235	0.021	0.025	0.0265	0.0235	0.02	0.0205	0.019	0.0205	0.0215	0.0185	0.02	0.0225	0.0185
2	0.0215	0.0235	0.02	0.024	0.0255	0.0225	0.0275	0.0285	0.0255	0.021	0.022	0.02	0.0225	0.0225	0.02	0.021	0.024	0.0195
2.25	0.0225	0.0255	0.021	0.025	0.0265	0.0235	0.029	0.0305	0.0275	0.022	0.023	0.021	0.0235	0.024	0.0205	0.022	0.0255	0.02
2.5	0.0235	0.027	0.022	0.0275	0.0285	0.025	0.0315	0.0325	0.0295	0.023	0.0245	0.022	0.025	0.0255	0.0225	0.0245	0.027	0.022
2.75	0.0245	0.028	0.023	0.0285	0.0305	0.0265	0.0335	0.0345	0.031	0.0245	0.0255	0.023	0.0265	0.027	0.0235	0.0245	0.0285	0.0225
3	0.0255	0.0295	0.0235	0.0305	0.0325	0.028	0.0365	0.0365	0.033	0.026	0.0275	0.0245	0.0275	0.0285	0.025	0.0265	0.03	0.024
3.25	0.0275	0.0315	0.025	0.0325	0.034	0.029	0.038	0.039	0.035	0.027	0.0285	0.0255	0.029	0.0295	0.0255	0.0275	0.0315	0.0245
3.5	0.028	0.0325	0.026	0.0345	0.036	0.031	0.0405	0.0415	0.038	0.0285	0.0295	0.027	0.0305	0.0315	0.028	0.029	0.033	0.0255
3.75	0.0305	0.034	0.0275	0.036	0.0385	0.033	0.044	0.0445	0.0405	0.0295	0.031	0.0285	0.0315	0.0325	0.028	0.03	0.0345	0.027
4	0.0315	0.0355	0.0285	0.038	0.0405	0.034	0.0465	0.047	0.0435	0.0315	0.0325	0.0295	0.0335	0.034	0.0305	0.0315	0.0365	0.028
4.25	0.0335	0.0375	0.0295	0.0405	0.042	0.036	0.049	0.05	0.0455	0.0325	0.0335	0.031	0.035	0.036	0.0315	0.0325	0.0385	0.0295
4.5	0.034	0.0385	0.031	0.0425	0.0445	0.038	0.052	0.0525	0.0485	0.0345	0.0355	0.032	0.0365	0.0375	0.0335	0.034	0.04	0.031
4.75	0.035	0.0405	0.0315	0.0435	0.046	0.0395	0.0525	0.0545	0.051	0.0345	0.0365	0.033	0.037	0.0385	0.0345	0.0345	0.041	0.031
5	0.0375	0.042	0.034	0.0445	0.048	0.041	0.056	0.057	0.054	0.0365	0.0385	0.0345	0.039	0.0405	0.036	0.036	0.043	0.033
5.25	0.0385	0.0435	0.0355	0.048	0.0495	0.044	0.0575	0.06	0.056	0.0385	0.04	0.036	0.041	0.042	0.038	0.0375	0.0455	0.034
5.5	0.04	0.045	0.0365	0.05	0.0515	0.0445	0.06	0.062	0.059	0.04	0.042	0.037	0.042	0.0435	0.0395	0.039	0.0465	0.0355
5.75	0.0425	0.0465	0.0375	0.052	0.0535	0.047	0.062	0.065	0.0615	0.0415	0.0445	0.039	0.0435	0.0455	0.0415	0.04	0.0485	0.0365
6	0.044	0.0485	0.0395	0.054	0.0555	0.049	0.0645	0.0675	0.063	0.043	0.046	0.0395	0.045	0.047	0.0425	0.041	0.05	0.0385
6.25	0.046	0.049	0.0415	0.056	0.0575	0.051	0.0665	0.07	0.0655	0.0445	0.048	0.041	0.046	0.049	0.0445	0.042	0.051	0.04
6.5	0.0475	0.0505	0.0425	0.0575	0.0595	0.053	0.068	0.072	0.0675	0.0455	0.049	0.042	0.0475	0.051	0.045	0.043	0.0535	0.0415
6.75	0.0495	0.052	0.044	0.0595	0.062	0.055	0.0705	0.075	0.07	0.0475	0.051	0.0435	0.0495	0.053	0.0465	0.044	0.0545	0.043
7	0.0515	0.053	0.046	0.0615	0.0645	0.0575	0.0725	0.077	0.0715	0.0495	0.053	0.0445	0.0505	0.0545	0.0485	0.045	0.056	0.0435
7.25	0.053	0.0545	0.0475	0.0625	0.0655	0.059	0.0745	0.079	0.0735	0.051	0.054	0.0455	0.052	0.056	0.0495	0.046	0.0575	0.045
7.5	0.054	0.0555	0.049	0.065	0.067	0.0605	0.077	0.081	0.0755	0.052	0.0555	0.0465	0.053	0.0575	0.0505	0.047	0.059	0.0455
7.75	0.055	0.0565	0.051	0.066	0.0695	0.0625	0.0785	0.0845	0.0775	0.0535	0.0565	0.048	0.055	0.0595	0.051	0.0485	0.0605	0.047
8	0.0575	0.058	0.0515	0.0675	0.0715	0.0645	0.081	0.0875	0.08	0.055	0.0585	0.049	0.0565	0.061	0.0525	0.05	0.0625	0.048
8.25	0.0585	0.059	0.053	0.0695	0.0745	0.0665	0.0835	0.09	0.0825	0.057	0.06	0.05	0.057	0.063	0.054	0.051	0.0635	0.048
8.5	0.06	0.0605	0.0545	0.0705	0.076	0.068	0.086	0.0925	0.0845	0.0585	0.0615	0.051	0.058	0.064	0.0545	0.052	0.0655	0.049
8.75	0.0605	0.0625	0.056	0.073	0.0785	0.07	0.088	0.095	0.0875	0.06	0.063	0.0525	0.06	0.0655	0.056	0.054	0.067	0.05
9	0.0615	0.064	0.0575	0.0745	0.081	0.072	0.091	0.098	0.0895	0.062	0.065	0.053	0.0615	0.068	0.057	0.055	0.069	0.0515
9.25	0.0625	0.066	0.059	0.077	0.0825	0.074	0.0935	0.101	0.0915	0.063	0.0665	0.0545	0.0625	0.0695	0.058	0.0565	0.0705	0.0515
9.5	0.064	0.068	0.0605	0.079	0.085	0.076	0.0955	0.1035	0.0945	0.0635	0.068	0.0555	0.0635	0.071	0.059	0.058	0.0725	0.053
9.75	0.065	0.0695	0.0615	0.081	0.088	0.078	0.0985	0.1065	0.097	0.066	0.0695	0.0565	0.0645	0.0735	0.0605	0.0595	0.0745	0.0535
10	0.067	0.0725	0.0635	0.0825	0.09	0.08	0.101	0.1095	0.099	0.067	0.071	0.0575	0.066	0.0755	0.061	0.0615	0.076	0.055
10.25	0.068	0.0735	0.065	0.084	0.093	0.082	0.1045	0.1125	0.102	0.07	0.073	0.0595	0.0675	0.0775	0.0625	0.063	0.078	0.056
10.5	0.07	0.0765	0.067	0.086	0.095	0.0845	0.107	0.116	0.1045	0.0715	0.075	0.061	0.069	0.08	0.0645	0.065	0.0805	0.057
10.75	0.071	0.0785	0.068	0.088	0.098	0.0865	0.1095	0.1185	0.107	0.073	0.077	0.062	0.0715	0.082	0.0655	0.067	0.0825	0.058
11	0.0725	0.08	0.07	0.0905	0.1005	0.088	0.112	0.122	0.11	0.075	0.079	0.063	0.072	0.084	0.067	0.068	0.0845	0.0595
11.25	0.074	0.083	0.0715	0.0935	0.1025	0.0895	0.114	0.125	0.113	0.077	0.0805	0.064	0.073	0.0865	0.0685	0.0695	0.086	0.0595
11.5	0.075	0.085	0.073	0.094	0.105	0.092	0.118	0.1275	0.115	0.0785	0.0825	0.066	0.075	0.089	0.0695	0.072	0.0885	0.0615
11.75	0.0765	0.0875	0.0755	0.097	0.1075	0.094	0.1205	0.131	0.118	0.081	0.084	0.067	0.0765	0.0905	0.071	0.0735	0.09	0.0625
12	0.0785	0.089	0.077	0.1005	0.111	0.097	0.124	0.1345	0.1205	0.083	0.0865	0.069	0.078	0.093	0.0725	0.0755	0.093	0.0645
12.25	0.08	0.0925	0.079	0.103	0.113	0.0985	0.127	0.138	0.1235	0.085	0.0885	0.0705	0.0795	0.096	0.074	0.077	0.095	0.0655
12.5	0.081	0.094	0.081	0.104	0.1165	0.1005	0.13	0.1405	0.1265	0.086	0.091	0.072	0.0815	0.0985	0.0755	0.079	0.096	0.067
12.75	0.0835	0.0965	0.0825	0.1075	0.1185	0.103	0.132	0.1445	0.1285	0.089	0.0925	0.0735	0.083	0.1	0.0765	0.08	0.0985	0.068
13	0.0845	0.0995	0.084	0.1095	0.1205	0.1055	0.136	0.147	0.132	0.091	0.0945	0.0755	0.085	0.103	0.079	0.082	0.101	0.0695
13.25	0.086	0.1015	0.086	0.113	0.123	0.1065	0.138	0.1505	0.135	0.0935	0.0965	0.0755	0.0855	0.106	0.0805	0.083	0.1025	0.07
13.5	0.0885	0.104	0.0875	0.115	0.126	0.1095	0.142	0.154	0.138	0.095	0.0995	0.0775	0.0885	0.1085	0.0815	0.085	0.104	0.072
13.75	0.0895	0.107	0.0885	0.118	0.128	0.1115	0.1445	0.1575	0.1415	0.0975	0.102	0.08	0.09	0.11	0.083	0.086	0.1075	0.0735
14	0.0925	0.1085	0.091	0.1205	0.131	0.113	0.1475	0.161	0.1435	0.099	0.1045	0.0815	0.0915	0.1135	0.084	0.088	0.1085	0.0745
14.25	0.094	0.1105	0.093	0.1235	0.1335	0.1155	0.151	0.165	0.1475	0.1015	0.106	0.083	0.093	0.115	0.0865	0.0895	0.111	0.0755
14.5	0.095	0.1135	0.0935	0.1255	0.1365	0.118	0.155	0.1685	0.1515	0.1035	0.1085	0.0845	0.095	0.1175	0.0875	0.092	0.114	0.0775
14.75	0.0975	0.1165	0.0955	0.1275	0.139	0.1195	0.1565	0.171	0.153	0.1055	0.1105	0.0855	0.0965	0.1205	0.089	0.0925	0.115	0.0785
15	0.0995	0.1185	0.0975	0.1305	0.1425	0.122	0.16	0.175	0.156	0.108	0.114	0.0875	0.0995	0.124	0.091	0.0945	0.118	0.08
15.25	0.1015	0.122	0.099	0.132	0.1435	0.123	0.164	0.1775	0.159	0.11	0.1155	0.0885	0.0995	0.1255	0.093	0.0965	0.12	0.081
15.5	0.104	0.1235	0.1	0.135	0.147	0.1255	0.1675	0.182	0.1625	0.112	0.1185	0.0905	0.101	0.1295	0.0935	0.098	0.122	0.0825
15.75	0.106	0.127	0.1025	0.137	0.1485	0.127	0.17	0.185	0.166	0.115	0.1195	0.0915	0.1025	0.131	0.095	0.099	0.123	0.0835
16	0.1075	0.1295	0.1035	0.139	0.1525	0.13	0.173	0.1885	0.168	0.1175	0.1235	0.094	0.105	0.1355	0.097	0.1015	0.126	0.0855
16.25	0.11	0.13	0.1055	0.142	0.156	0.132	0.1765	0.1925	0.1715	0.12	0.126	0.0955	0.108	0.1365	0.0985	0.103	0.128	0.087
16.5	0.113	0.132	0.108	0.145	0.1565	0.134	0.1805	0.196	0.175	0.122	0.127	0.098	0.109	0.1385	0.1005	0.1045	0.13	0.0885
16.75	0.1145	0.1345	0.11	0.1475	0.16	0.1375	0.1835	0.2005	0.178	0.1255	0.1295	0.101	0.112	0.14	0.103	0.1065	0.1325	0.0905
17	0.1165	0.137	0.1115	0.1495	0.1625	0.139	0.187	0.2025	0.1815	0.1275	0.1325	0.102	0.114	0.143	0.104	0.108	0.134	0.0915
17.25	0.119	0.14	0.1135	0.152	0.1655	0.1405	0.19	0.207	0.184	0.1295	0.134	0.103	0.115	0.1455	0.1055	0.11	0.1365	0.0935
17.5	0.1215	0.1435	0.1155	0.155	0.1685	0.1435	0.194	0.211	0.187	0.1325	0.1365	0.1055	0.119	0.149	0.1085	0.112	0.1395	0.0955
17.75	0.123	0.146	0.117	0.1575	0.171	0.146	0.197	0.215	0.191	0.1345	0.1395	0.1075	0.12	0.152	0.11	0.114	0.141	0.097
18	0.1245	0.1475	0.1185	0.159	0.1735	0.1475	0.1995	0.2175	0.1935	0.136	0.1425	0.1085	0.1225	0.1545	0.1115	0.1145	0.1425	0.099
18.25	0.128	0.151	0.121	0.1615	0.175	0.149	0.203	0.2205	0.1965	0.1395	0.1445	0.11	0.1225	0.157	0.113	0.1165	0.144	0.1
18.5	0.1295	0.1545	0.123	0.1645	0.1785	0.1515	0.206	0.224	0.199	0.1415	0.147	0.113	0.126	0.1595	0.1145	0.118	0.1465	0.101
18.75	0.1315	0.156	0.1245	0.168	0.1815	0.155	0.209	0.2275	0.2025	0.143	0.1505	0.115	0.1285	0.163	0.1175	0.1205	0.149	0.104
19	0.1335	0.159	0.1265	0.1695	0.1845	0.1565	0.2125	0.2305	0.205	0.146	0.152	0.1165	0.1295	0.1655	0.119	0.121	0.1505	0.105
19.25	0.1365	0.1615	0.1285	0.1715	0.187	0.158	0.2155	0.233	0.209	0.148	0.1545	0.1185	0.132	0.168	0.121	0.1235	0.1535	0.1065
19.5	0.1395	0.165	0.131	0.1745	0.1895	0.161	0.2185	0.2375	0.211	0.1505	0.1575	0.1205	0.134	0.1705	0.1225	0.125	0.156	0.108
19.75	0.141	0.166	0.1325	0.1785	0.193	0.1635	0.2225	0.241	0.214	0.154	0.1605	0.123	0.136	0.174	0.1255	0.128	0.1585	0.11
20	0.143	0.1695	0.135	0.18	0.194	0.1645	0.2245	0.2435	0.217	0.1555	0.161	0.124	0.1375	0.1755	0.1265	0.1295	0.1605	0.111
20.25	0.145	0.1715	0.137	0.183	0.1975	0.1675	0.228	0.2475	0.221	0.158	0.165	0.127	0.141	0.179	0.129	0.1315	0.163	0.113
20.5	0.149	0.1735	0.139	0.1845	0.2	0.1695	0.2315	0.25	0.223	0.1605	0.168	0.129	0.142	0.181	0.1305	0.132	0.1645	0.1145
20.75	0.15	0.1765	0.1415	0.1875	0.202	0.1725	0.2335	0.253	0.226	0.163	0.1695	0.132	0.1455	0.1825	0.1325	0.1345	0.1665	0.116
21	0.153	0.1785	0.143	0.19	0.204	0.1745	0.237	0.256	0.229	0.165	0.172	0.1335	0.1465	0.1855	0.135	0.136	0.1685	0.1185
21.25	0.155	0.1805	0.146	0.1935	0.206	0.176	0.2395	0.26	0.2305	0.168	0.174	0.1345	0.1485	0.1885	0.1365	0.139	0.173	0.1195
21.5	0.1575	0.186	0.1475	0.1955	0.21	0.1785	0.2425	0.262	0.2345	0.17	0.1765	0.137	0.151	0.19	0.139	0.141	0.173	0.1215
21.75	0.159	0.1865	0.149	0.198	0.2135	0.181	0.2455	0.2645	0.238	0.1715	0.1815	0.1395	0.1525	0.1955	0.142	0.142	0.175	0.1235
22	0.1605	0.189	0.152	0.2	0.2145	0.1835	0.2475	0.2645	0.24	0.174	0.1815	0.141	0.155	0.1945	0.1425	0.1435	0.176	0.1245
22.25	0.164	0.19	0.154	0.2025	0.2165	0.1845	0.251	0.271	0.241	0.177	0.1845	0.143	0.157	0.199	0.145	0.1455	0.1795	0.1265
22.5	0.1655	0.194	0.1555	0.205	0.219	0.1875	0.2525	0.273	0.246	0.178	0.1865	0.1465	0.16	0.1995	0.147	0.147	0.181	0.128
22.75	0.169	0.195	0.158	0.208	0.222	0.1895	0.2575	0.277	0.249	0.1805	0.1895	0.1485	0.161	0.2025	0.1495	0.1495	0.1825	0.1295
23	0.1695	0.197	0.16	0.2095	0.2235	0.192	0.2595	0.281	0.25	0.183	0.1905	0.1505	0.1635	0.204	0.152	0.1515	0.186	0.132
23.25	0.1715	0.199	0.161	0.2125	0.226	0.1935	0.264	0.2835	0.2525	0.186	0.1935	0.1525	0.1655	0.2065	0.155	0.154	0.187	0.134
23.5	0.175	0.201	0.1635	0.2145	0.2285	0.1955	0.2665	0.287	0.257	0.187	0.1945	0.153	0.166	0.209	0.1555	0.1545	0.1885	0.135
23.75	0.1755	0.203	0.1645	0.217	0.2305	0.198	0.2705	0.291	0.261	0.191	0.1965	0.1575	0.1695	0.2105	0.158	0.157	0.192	0.1375
24	0.1775	0.2075	0.1675	0.2185	0.2325	0.199	0.274	0.2925	0.265	0.192	0.198	0.1575	0.17	0.2125	0.1595	0.1585	0.1925	0.1385
24.25	0.181	0.208	0.1695	0.222	0.236	0.201	0.2745	0.3	0.268	0.1945	0.202	0.1595	0.1725	0.216	0.161	0.1615	0.1955	0.14
24.5	0.1825	0.211	0.1715	0.226	0.2385	0.203	0.281	0.3045	0.2735	0.1975	0.2045	0.163	0.176	0.218	0.164	0.1635	0.198	0.1425
24.75	0.184	0.214	0.1735	0.229	0.2405	0.205	0.284	0.308	0.277	0.1995	0.207	0.1635	0.1765	0.22	0.1655	0.165	0.201	0.143
25	0.185	0.2145	0.175	0.2305	0.244	0.205	0.2855	0.312	0.281	0.2005	0.2085	0.166	0.178	0.223	0.167	0.167	0.2015	0.1455
25.25	0.1885	0.2165	0.1775	0.2335	0.246	0.2055	0.2925	0.311	0.2855	0.203	0.2105	0.167	0.179	0.224	0.1695	0.1685	0.203	0.1465
25.5	0.192	0.221	0.1795	0.235	0.2475	0.2065	0.2955	0.3175	0.29	0.2055	0.2135	0.17	0.1825	0.226	0.1715	0.171	0.2055	0.1495
25.75	0.1925	0.2235	0.182	0.2375	0.2505	0.2055	0.3005	0.3195	0.294	0.207	0.2155	0.1725	0.1855	0.231	0.1735	0.172	0.207	0.1515
26	0.1965	0.223	0.184	0.2405	0.2535	0.2065	0.305	0.321	0.2985	0.211	0.218	0.172	0.184	0.2315	0.1755	0.175	0.211	0.151
26.25	0.198	0.2265	0.1855	0.243	0.254	0.207	0.3085	0.324	0.301	0.2125	0.2205	0.176	0.188	0.233	0.1785	0.177	0.2115	0.155
26.5	0.2005	0.2275	0.188	0.244	0.2565	0.2065	0.3105	0.3275	0.3055	0.215	0.223	0.178	0.19	0.236	0.18	0.1785	0.214	0.1565
26.75	0.2015	0.2295	0.1895	0.246	0.2575	0.2055	0.316	0.3275	0.307	0.217	0.2255	0.1795	0.1915	0.236	0.1825	0.181	0.2165	0.158
27	0.204	0.232	0.1915	0.248	0.259	0.204	0.3175	0.329	0.3095	0.22	0.226	0.1805	0.1925	0.238	0.184	0.1835	0.218	0.16
27.25	0.205	0.2325	0.1935	0.248	0.2615	0.2025	0.3185	0.332	0.3105	0.222	0.2285	0.1835	0.1955	0.241	0.186	0.184	0.2195	0.162
27.5	0.208	0.236	0.196	0.2485	0.261	0.2005	0.3195	0.329	0.3115	0.2235	0.2285	0.184	0.1965	0.2415	0.188	0.1855	0.2205	0.163
27.75	0.2105	0.2365	0.197	0.251	0.2635	0.199	0.323	0.33	0.311	0.2265	0.2325	0.1865	0.199	0.2455	0.19	0.1885	0.2215	0.1655
28	0.2125	0.2375	0.198	0.2515	0.263	0.1975	0.324	0.3305	0.3125	0.229	0.234	0.1885	0.202	0.2455	0.191	0.191	0.224	0.167

## Sheet: NaCl 4%
Timepoint (hour)	WT			ΔrhlB (Δyptb0165)			ΔcsdA (Δyptb0486)			ΔrhlE (Δyptb1214)			ΔdbpA (Δyptb1652)			ΔsrmB (Δyptb2900)
	OD600 (median)	OD600 (max)	OD600 (min)	OD600 (median)	OD600 (max)	OD600 (min)	OD600 (median)	OD600 (max)	OD600 (min)	OD600 (median)	OD600 (max)	OD600 (min)	OD600 (median)	OD600 (max)	OD600 (min)	OD600 (median)	OD600 (max)	OD600 (min)
0	0.0115	0.013	0.01	0.012	0.0125	0.009	0.012	0.013	0.0115	0.0125	0.013	0.0105	0.012	0.0125	0.0105	0.012	0.013	0.0105
0.25	0.0115	0.013	0.0105	0.0115	0.0135	0.01	0.012	0.0125	0.011	0.0125	0.013	0.0105	0.012	0.0125	0.0105	0.012	0.013	0.011
0.5	0.0115	0.0135	0.0105	0.012	0.014	0.01	0.012	0.0125	0.0115	0.013	0.0135	0.0105	0.0115	0.013	0.0105	0.012	0.014	0.0105
0.75	0.0115	0.014	0.011	0.013	0.0145	0.0115	0.012	0.013	0.0115	0.0135	0.0145	0.011	0.0125	0.014	0.0115	0.013	0.0135	0.0105
1	0.0125	0.0145	0.011	0.014	0.015	0.0125	0.012	0.0125	0.012	0.0145	0.015	0.0125	0.013	0.0145	0.0115	0.0135	0.0145	0.0115
1.25	0.0125	0.015	0.012	0.015	0.0165	0.014	0.0115	0.013	0.0115	0.0155	0.016	0.0125	0.0135	0.0155	0.0125	0.014	0.0155	0.012
1.5	0.0135	0.016	0.013	0.0165	0.0175	0.0155	0.012	0.0135	0.012	0.0165	0.0175	0.014	0.0145	0.0165	0.0135	0.0155	0.016	0.013
1.75	0.015	0.018	0.0145	0.018	0.0195	0.017	0.013	0.014	0.0125	0.0185	0.019	0.0155	0.0165	0.018	0.0155	0.0175	0.018	0.014
2	0.0165	0.019	0.0155	0.02	0.021	0.0185	0.013	0.0145	0.013	0.02	0.021	0.017	0.0175	0.02	0.0165	0.0185	0.023	0.015
2.25	0.018	0.0205	0.0165	0.0215	0.0225	0.0205	0.014	0.015	0.0135	0.021	0.0225	0.0185	0.019	0.0215	0.0185	0.0195	0.0225	0.0165
2.5	0.02	0.023	0.019	0.0235	0.0245	0.022	0.0155	0.0165	0.0145	0.0235	0.024	0.0205	0.021	0.0235	0.0205	0.0215	0.023	0.018
2.75	0.0215	0.0245	0.0205	0.0255	0.027	0.024	0.0165	0.0175	0.016	0.025	0.0265	0.022	0.023	0.025	0.0215	0.023	0.025	0.02
3	0.0235	0.027	0.022	0.028	0.029	0.026	0.0175	0.019	0.0175	0.0275	0.0285	0.0235	0.0255	0.0275	0.0245	0.0255	0.0275	0.0215
3.25	0.0255	0.029	0.024	0.0295	0.031	0.0275	0.0185	0.0195	0.0185	0.029	0.0305	0.025	0.027	0.0295	0.0255	0.027	0.0295	0.023
3.5	0.0275	0.0305	0.026	0.0325	0.0335	0.03	0.0205	0.0215	0.02	0.0315	0.033	0.028	0.03	0.0315	0.0285	0.0295	0.0315	0.0255
3.75	0.0295	0.033	0.028	0.0345	0.036	0.0315	0.0215	0.0235	0.0215	0.0345	0.0355	0.0295	0.0325	0.0345	0.031	0.031	0.035	0.0275
4	0.0325	0.036	0.0305	0.0375	0.04	0.035	0.024	0.0255	0.024	0.0375	0.0385	0.0325	0.0355	0.0375	0.0335	0.034	0.037	0.0295
4.25	0.035	0.0385	0.0325	0.0405	0.042	0.0375	0.0255	0.0265	0.025	0.0395	0.0415	0.035	0.038	0.04	0.036	0.036	0.04	0.0325
4.5	0.038	0.041	0.0355	0.044	0.046	0.0405	0.0275	0.0295	0.027	0.043	0.045	0.038	0.0415	0.0435	0.0395	0.039	0.043	0.035
4.75	0.0405	0.045	0.038	0.0465	0.049	0.043	0.0295	0.0305	0.029	0.046	0.0475	0.0405	0.0445	0.046	0.0425	0.0415	0.0465	0.037
5	0.0435	0.0475	0.041	0.0505	0.052	0.0465	0.032	0.0325	0.031	0.0495	0.0515	0.0435	0.0485	0.0505	0.0455	0.0445	0.0495	0.04
5.25	0.047	0.0515	0.0445	0.0555	0.056	0.0505	0.035	0.036	0.0335	0.0525	0.0555	0.047	0.052	0.054	0.049	0.048	0.053	0.0435
5.5	0.051	0.0555	0.048	0.058	0.06	0.0545	0.0375	0.038	0.0365	0.0555	0.0605	0.051	0.055	0.058	0.052	0.052	0.059	0.0475
5.75	0.054	0.0595	0.052	0.0605	0.0645	0.0585	0.04	0.041	0.0395	0.06	0.0655	0.0555	0.058	0.0635	0.0555	0.056	0.063	0.051
6	0.0565	0.064	0.056	0.064	0.069	0.0615	0.043	0.044	0.0415	0.0635	0.0695	0.0595	0.0615	0.068	0.0585	0.06	0.0655	0.055
6.25	0.0615	0.069	0.059	0.068	0.074	0.0645	0.0465	0.047	0.0445	0.068	0.0745	0.0655	0.065	0.0735	0.0625	0.0645	0.07	0.06
6.5	0.0655	0.0745	0.0615	0.0725	0.079	0.069	0.05	0.051	0.0485	0.0715	0.0805	0.0695	0.068	0.0795	0.0655	0.0695	0.075	0.0635
6.75	0.071	0.0795	0.066	0.0775	0.085	0.0735	0.055	0.055	0.0525	0.0765	0.085	0.075	0.0715	0.085	0.071	0.0725	0.08	0.068
7	0.077	0.086	0.07	0.0835	0.0905	0.0785	0.0585	0.059	0.056	0.081	0.0905	0.0795	0.076	0.0915	0.075	0.0765	0.0865	0.0725
7.25	0.0825	0.0915	0.074	0.0895	0.096	0.0825	0.061	0.0635	0.06	0.0865	0.097	0.084	0.0805	0.098	0.08	0.0805	0.0925	0.076
7.5	0.0875	0.0975	0.0785	0.0955	0.1025	0.0875	0.0645	0.068	0.064	0.0935	0.1025	0.089	0.086	0.1045	0.084	0.085	0.098	0.081
7.75	0.0945	0.1035	0.0835	0.102	0.109	0.0925	0.069	0.072	0.0685	0.0995	0.11	0.095	0.091	0.111	0.0905	0.0915	0.104	0.087
8	0.1005	0.112	0.0885	0.108	0.115	0.098	0.074	0.0775	0.072	0.107	0.117	0.1005	0.0965	0.1185	0.0955	0.097	0.1105	0.092
8.25	0.1085	0.1185	0.095	0.114	0.122	0.1045	0.0795	0.083	0.0775	0.114	0.124	0.106	0.102	0.1265	0.1005	0.104	0.117	0.0975
8.5	0.1145	0.127	0.0995	0.12	0.129	0.1085	0.085	0.0885	0.0825	0.121	0.131	0.11	0.107	0.1335	0.106	0.11	0.1235	0.102
8.75	0.122	0.1335	0.105	0.1255	0.135	0.1135	0.09	0.0935	0.0875	0.127	0.1365	0.1155	0.1115	0.1405	0.111	0.117	0.128	0.1055
9	0.1295	0.1395	0.1095	0.13	0.141	0.118	0.0955	0.1005	0.0925	0.134	0.1435	0.1215	0.1175	0.147	0.1155	0.123	0.1325	0.1105
9.25	0.1355	0.1455	0.1145	0.1345	0.1475	0.124	0.1015	0.1075	0.099	0.14	0.1495	0.127	0.1235	0.153	0.1215	0.1285	0.1385	0.1155
9.5	0.141	0.1515	0.118	0.139	0.152	0.128	0.1075	0.113	0.104	0.145	0.154	0.13	0.127	0.159	0.1255	0.133	0.1425	0.119
9.75	0.1495	0.158	0.1225	0.143	0.1575	0.133	0.1135	0.119	0.11	0.1515	0.1605	0.1345	0.132	0.166	0.1295	0.1385	0.1475	0.122
10	0.1525	0.161	0.126	0.147	0.1605	0.136	0.119	0.125	0.1155	0.1555	0.1635	0.1395	0.136	0.1695	0.134	0.1425	0.1515	0.127
10.25	0.1585	0.1685	0.13	0.151	0.166	0.1385	0.1255	0.1305	0.122	0.1605	0.1675	0.1425	0.14	0.176	0.1375	0.148	0.1565	0.13
10.5	0.162	0.1705	0.1355	0.1545	0.171	0.142	0.1315	0.136	0.128	0.166	0.171	0.1465	0.143	0.179	0.1415	0.1525	0.1595	0.132
10.75	0.165	0.174	0.1375	0.158	0.176	0.1465	0.136	0.1415	0.1345	0.1695	0.175	0.1505	0.147	0.183	0.144	0.156	0.162	0.135
11	0.17	0.179	0.141	0.162	0.18	0.15	0.1415	0.1475	0.138	0.1735	0.1795	0.153	0.149	0.187	0.1475	0.16	0.1645	0.1375
11.25	0.173	0.1825	0.1425	0.1655	0.1845	0.153	0.146	0.153	0.1435	0.1775	0.184	0.156	0.1535	0.1935	0.15	0.163	0.17	0.1395
11.5	0.1765	0.1865	0.147	0.1685	0.188	0.1565	0.1515	0.157	0.1485	0.1805	0.1875	0.161	0.157	0.1975	0.154	0.168	0.172	0.1435
11.75	0.182	0.192	0.15	0.172	0.1915	0.1605	0.157	0.163	0.154	0.187	0.192	0.1645	0.161	0.2025	0.1585	0.172	0.177	0.1465
12	0.1855	0.196	0.1525	0.1755	0.1955	0.1635	0.161	0.167	0.1585	0.1895	0.197	0.1675	0.164	0.2065	0.1615	0.175	0.1805	0.1495
12.25	0.1875	0.197	0.154	0.178	0.2	0.1685	0.1645	0.17	0.163	0.1915	0.2	0.171	0.1675	0.21	0.1635	0.1785	0.183	0.1505
12.5	0.1935	0.2025	0.16	0.1825	0.203	0.172	0.168	0.1735	0.167	0.196	0.2035	0.1745	0.1715	0.2145	0.1685	0.1825	0.1865	0.154
12.75	0.197	0.2065	0.163	0.1865	0.2075	0.1755	0.173	0.1785	0.1715	0.2	0.2075	0.178	0.176	0.2185	0.1725	0.1875	0.19	0.1565
13	0.1995	0.2085	0.166	0.19	0.2115	0.179	0.1755	0.1815	0.1755	0.203	0.2095	0.179	0.1805	0.2215	0.1765	0.191	0.193	0.161
13.25	0.2055	0.2145	0.169	0.192	0.2145	0.182	0.181	0.1835	0.1775	0.2075	0.2155	0.1855	0.1855	0.2275	0.1805	0.194	0.1975	0.164
13.5	0.2085	0.2175	0.1715	0.196	0.218	0.183	0.183	0.1865	0.181	0.2115	0.2185	0.188	0.188	0.232	0.184	0.1975	0.2015	0.166
13.75	0.2125	0.221	0.1745	0.199	0.222	0.1885	0.188	0.1925	0.185	0.215	0.224	0.19	0.1905	0.2355	0.1875	0.2005	0.204	0.1695
14	0.217	0.2255	0.178	0.2015	0.2245	0.1905	0.192	0.1955	0.1865	0.2195	0.226	0.1945	0.195	0.2395	0.1905	0.2035	0.206	0.1715
14.25	0.2215	0.231	0.1815	0.205	0.2285	0.193	0.198	0.2	0.1925	0.2245	0.23	0.199	0.2	0.246	0.196	0.2085	0.212	0.1745
14.5	0.225	0.2345	0.185	0.2075	0.232	0.1965	0.2025	0.2055	0.1965	0.228	0.2365	0.2025	0.203	0.2485	0.199	0.2115	0.2155	0.177
14.75	0.2275	0.2365	0.1885	0.2105	0.2355	0.1995	0.205	0.2105	0.2	0.23	0.2385	0.204	0.207	0.249	0.2015	0.2145	0.216	0.1805
15	0.234	0.2415	0.1905	0.2135	0.2365	0.2005	0.208	0.213	0.202	0.235	0.2415	0.208	0.211	0.2575	0.2045	0.2175	0.2195	0.183
15.25	0.2375	0.2455	0.1935	0.215	0.24	0.2035	0.212	0.2175	0.207	0.24	0.2465	0.2135	0.215	0.262	0.2085	0.22	0.224	0.1855
15.5	0.2425	0.25	0.1985	0.219	0.244	0.2085	0.218	0.2225	0.2135	0.2435	0.2515	0.2185	0.219	0.2665	0.2125	0.2235	0.2305	0.188
15.75	0.2445	0.252	0.2005	0.2215	0.247	0.21	0.2195	0.2245	0.2165	0.246	0.2525	0.2195	0.221	0.2695	0.2145	0.227	0.23	0.1905
16	0.2495	0.2575	0.2045	0.2245	0.2515	0.2135	0.2245	0.231	0.2215	0.2505	0.2585	0.223	0.225	0.2745	0.219	0.2305	0.235	0.194
16.25	0.253	0.261	0.2075	0.2285	0.252	0.216	0.229	0.2335	0.225	0.2535	0.259	0.2265	0.2295	0.278	0.222	0.234	0.237	0.196
16.5	0.255	0.264	0.211	0.23	0.258	0.2205	0.232	0.2385	0.2295	0.256	0.265	0.229	0.233	0.281	0.224	0.2355	0.2395	0.1995
16.75	0.26	0.2695	0.215	0.2345	0.262	0.223	0.238	0.244	0.235	0.2615	0.27	0.2345	0.236	0.2865	0.227	0.24	0.244	0.2025
17	0.264	0.274	0.219	0.2375	0.2645	0.2265	0.241	0.247	0.236	0.2655	0.272	0.238	0.2395	0.2895	0.2325	0.2425	0.249	0.2045
17.25	0.266	0.2755	0.221	0.2415	0.269	0.2305	0.245	0.251	0.241	0.266	0.276	0.242	0.243	0.2915	0.234	0.2455	0.25	0.207
17.5	0.2715	0.2805	0.226	0.245	0.2725	0.233	0.2485	0.257	0.245	0.272	0.2795	0.245	0.246	0.2995	0.239	0.25	0.254	0.2095
17.75	0.2725	0.283	0.227	0.2475	0.275	0.234	0.253	0.2615	0.2505	0.2735	0.282	0.2465	0.249	0.3	0.242	0.2525	0.255	0.212
18	0.279	0.288	0.2305	0.252	0.277	0.238	0.2575	0.2625	0.2525	0.2775	0.2835	0.2515	0.253	0.3045	0.246	0.2555	0.259	0.215
18.25	0.282	0.29	0.234	0.255	0.282	0.242	0.26	0.2675	0.257	0.281	0.2885	0.2535	0.257	0.309	0.2495	0.2595	0.2635	0.2175
18.5	0.288	0.296	0.237	0.2595	0.285	0.245	0.2675	0.273	0.261	0.285	0.2925	0.2585	0.261	0.3125	0.254	0.263	0.265	0.2215
18.75	0.2915	0.3005	0.2435	0.2645	0.2905	0.252	0.2725	0.278	0.2665	0.289	0.2975	0.263	0.2675	0.317	0.259	0.266	0.27	0.2255
19	0.293	0.3015	0.245	0.2655	0.292	0.252	0.273	0.28	0.268	0.2905	0.299	0.2645	0.27	0.3165	0.2615	0.269	0.2715	0.227
19.25	0.297	0.3065	0.247	0.2685	0.2955	0.2545	0.2765	0.2835	0.272	0.2945	0.301	0.267	0.272	0.322	0.263	0.2715	0.2735	0.229
19.5	0.3025	0.3105	0.251	0.274	0.298	0.2595	0.2815	0.2875	0.2755	0.298	0.3045	0.2715	0.2755	0.3255	0.2665	0.274	0.2795	0.2315
19.75	0.305	0.314	0.2545	0.278	0.3035	0.264	0.287	0.291	0.2795	0.3015	0.309	0.2765	0.2805	0.3285	0.2695	0.2775	0.282	0.235
20	0.307	0.3145	0.255	0.279	0.3055	0.264	0.2895	0.296	0.283	0.3005	0.3105	0.2775	0.2825	0.3285	0.272	0.2805	0.2835	0.237
20.25	0.31	0.318	0.259	0.283	0.308	0.268	0.292	0.3025	0.288	0.3025	0.314	0.2805	0.287	0.332	0.277	0.2835	0.2865	0.2405
20.5	0.313	0.321	0.2635	0.2865	0.313	0.274	0.297	0.3035	0.291	0.3065	0.318	0.2835	0.2915	0.3345	0.28	0.287	0.289	0.244
20.75	0.3185	0.3255	0.2645	0.293	0.316	0.276	0.303	0.308	0.2955	0.3105	0.3195	0.289	0.293	0.34	0.2815	0.289	0.295	0.2465
21	0.3205	0.3275	0.267	0.2935	0.3185	0.279	0.3035	0.314	0.3005	0.3125	0.322	0.288	0.297	0.34	0.285	0.2935	0.295	0.2495
21.25	0.3235	0.3315	0.269	0.299	0.3215	0.282	0.3075	0.314	0.304	0.3145	0.326	0.292	0.3	0.3415	0.2865	0.295	0.2975	0.252
21.5	0.325	0.333	0.273	0.3025	0.3245	0.287	0.312	0.318	0.309	0.316	0.3275	0.2945	0.3035	0.343	0.2885	0.2985	0.3	0.255
21.75	0.3305	0.337	0.2765	0.3065	0.3285	0.2905	0.3165	0.3235	0.3115	0.319	0.33	0.299	0.305	0.3465	0.293	0.301	0.3035	0.256
22	0.3295	0.3375	0.277	0.308	0.33	0.292	0.3185	0.3295	0.3185	0.3185	0.333	0.299	0.309	0.3455	0.297	0.3035	0.3045	0.259
22.25	0.3345	0.341	0.2815	0.3125	0.334	0.295	0.324	0.33	0.3205	0.322	0.3345	0.303	0.313	0.3465	0.2985	0.3055	0.3065	0.263
22.5	0.3365	0.3425	0.285	0.315	0.335	0.2985	0.3285	0.334	0.325	0.3235	0.3375	0.303	0.318	0.3505	0.3035	0.3075	0.309	0.2665
22.75	0.3385	0.3455	0.282	0.3185	0.3385	0.298	0.3285	0.335	0.323	0.324	0.3395	0.305	0.315	0.35	0.302	0.3105	0.3115	0.2655
23	0.3415	0.3475	0.285	0.32	0.34	0.3015	0.3325	0.338	0.328	0.326	0.343	0.3065	0.319	0.3515	0.3045	0.3125	0.314	0.2675
23.25	0.344	0.3525	0.289	0.322	0.3445	0.3035	0.3355	0.3435	0.3305	0.3295	0.3435	0.307	0.3245	0.3555	0.309	0.314	0.3165	0.2705
23.5	0.3465	0.353	0.2885	0.324	0.3455	0.306	0.34	0.345	0.336	0.3315	0.346	0.309	0.325	0.3565	0.3105	0.317	0.3175	0.2715
23.75	0.3475	0.355	0.2925	0.329	0.347	0.3075	0.3405	0.3475	0.3375	0.331	0.348	0.312	0.3305	0.3545	0.3135	0.3165	0.3195	0.274
24	0.3465	0.355	0.2975	0.332	0.3475	0.309	0.345	0.3545	0.3435	0.3345	0.35	0.3115	0.3355	0.3555	0.317	0.3165	0.322	0.278
24.25	0.3525	0.361	0.2955	0.338	0.353	0.311	0.348	0.3525	0.3425	0.3345	0.3525	0.3195	0.3345	0.36	0.314	0.322	0.324	0.2765
24.5	0.3505	0.3625	0.298	0.342	0.3555	0.311	0.3505	0.356	0.345	0.3345	0.3525	0.32	0.338	0.361	0.316	0.3225	0.325	0.2795
24.75	0.3545	0.363	0.2975	0.3405	0.3545	0.3125	0.353	0.3565	0.3485	0.3335	0.3565	0.318	0.34	0.3595	0.32	0.322	0.3275	0.2815
25	0.3555	0.3645	0.2995	0.345	0.358	0.3135	0.3565	0.3605	0.352	0.336	0.357	0.32	0.3435	0.3615	0.323	0.324	0.3285	0.283
25.25	0.355	0.362	0.302	0.346	0.3565	0.314	0.3585	0.363	0.355	0.334	0.359	0.319	0.3465	0.3585	0.326	0.3235	0.3295	0.2865
25.5	0.357	0.365	0.3065	0.3465	0.359	0.314	0.36	0.3645	0.3585	0.3375	0.358	0.3195	0.353	0.363	0.33	0.323	0.3305	0.2895
25.75	0.3565	0.3655	0.304	0.346	0.3605	0.313	0.3615	0.366	0.3595	0.337	0.3585	0.3195	0.3525	0.361	0.327	0.3235	0.3295	0.289
26	0.3595	0.367	0.3045	0.347	0.362	0.3125	0.362	0.368	0.3615	0.3365	0.361	0.32	0.354	0.364	0.3305	0.3235	0.3325	0.2905
26.25	0.3605	0.368	0.3055	0.346	0.363	0.3115	0.3645	0.3685	0.3615	0.337	0.3615	0.3225	0.3555	0.363	0.3295	0.326	0.334	0.2915
26.5	0.3605	0.3695	0.307	0.346	0.364	0.31	0.3655	0.371	0.365	0.338	0.363	0.324	0.3575	0.364	0.33	0.328	0.333	0.295
26.75	0.362	0.37	0.309	0.343	0.365	0.3095	0.366	0.3695	0.365	0.338	0.367	0.3245	0.36	0.3635	0.334	0.327	0.3355	0.2945
27	0.3585	0.366	0.311	0.3405	0.368	0.305	0.3655	0.3725	0.3645	0.337	0.3645	0.326	0.356	0.363	0.33	0.326	0.333	0.296
27.25	0.3595	0.366	0.3135	0.3425	0.3685	0.304	0.368	0.3725	0.3665	0.3355	0.3695	0.325	0.358	0.3675	0.334	0.324	0.334	0.2985
27.5	0.3595	0.368	0.311	0.3405	0.3695	0.3015	0.3675	0.3725	0.367	0.3355	0.372	0.324	0.358	0.3665	0.334	0.327	0.3335	0.2975
27.75	0.3595	0.367	0.3145	0.337	0.3715	0.2975	0.3685	0.372	0.368	0.335	0.3745	0.324	0.357	0.37	0.337	0.326	0.3325	0.3
28	0.3585	0.364	0.3145	0.337	0.372	0.2955	0.3675	0.3715	0.366	0.3345	0.376	0.3245	0.3565	0.37	0.336	0.3265	0.3325	0.3

## Sheet: Ethanol 3%
Timepoint (hour)	WT			ΔrhlB (Δyptb0165)			ΔcsdA (Δyptb0486)			ΔrhlE (Δyptb1214)			ΔdbpA (Δyptb1652)			ΔsrmB (Δyptb2900)
	OD600 (median)	OD600 (max)	OD600 (min)	OD600 (median)	OD600 (max)	OD600 (min)	OD600 (median)	OD600 (max)	OD600 (min)	OD600 (median)	OD600 (max)	OD600 (min)	OD600 (median)	OD600 (max)	OD600 (min)	OD600 (median)	OD600 (max)	OD600 (min)
0	0	0.001	0	0.0005	0.0015	0	0.002	0.002	0.001	0.0005	0.002	0	0.0015	0.003	0.001	0.0015	0.0025	0.001
0.25	0.0005	0.001	0	0.0005	0.0015	0	0.0015	0.002	0.001	0.0005	0.002	0	0.0015	0.0025	0.001	0.0015	0.0025	0.001
0.5	0.0015	0.002	0.001	0.0015	0.0025	0.0005	0.0025	0.003	0.002	0.0015	0.003	0.001	0.0025	0.0035	0.002	0.0025	0.0035	0.002
0.75	0.002	0.0025	0.001	0.0025	0.003	0.0015	0.0035	0.0035	0.0025	0.002	0.0035	0.0015	0.003	0.004	0.0025	0.003	0.004	0.0025
1	0.0025	0.003	0.002	0.003	0.004	0.0025	0.0035	0.004	0.003	0.003	0.0045	0.002	0.0035	0.0045	0.003	0.004	0.0045	0.0035
1.25	0.003	0.0035	0.0025	0.0035	0.0045	0.0025	0.0045	0.0045	0.0035	0.0035	0.0045	0.0025	0.0045	0.0055	0.0035	0.004	0.0055	0.004
1.5	0.004	0.0045	0.0035	0.0045	0.0055	0.0035	0.005	0.0055	0.0045	0.0045	0.0055	0.004	0.0055	0.0065	0.004	0.005	0.006	0.005
1.75	0.005	0.005	0.004	0.0055	0.0065	0.0045	0.006	0.0065	0.005	0.006	0.0065	0.0045	0.0065	0.007	0.0055	0.006	0.007	0.006
2	0.006	0.006	0.005	0.0065	0.007	0.0055	0.007	0.0075	0.0065	0.0065	0.0075	0.006	0.0075	0.0085	0.0065	0.007	0.0075	0.0065
2.25	0.007	0.007	0.006	0.0075	0.0085	0.0065	0.008	0.0085	0.007	0.008	0.0085	0.0065	0.009	0.01	0.0075	0.008	0.0085	0.007
2.5	0.0075	0.008	0.007	0.0085	0.0095	0.0075	0.009	0.0095	0.0085	0.009	0.0095	0.0075	0.0095	0.0105	0.008	0.0085	0.009	0.008
2.75	0.0085	0.009	0.008	0.0095	0.0105	0.0085	0.0105	0.0115	0.01	0.01	0.0105	0.009	0.011	0.012	0.0095	0.01	0.0105	0.009
3	0.0095	0.01	0.009	0.0105	0.0115	0.0095	0.012	0.0125	0.011	0.011	0.0115	0.0095	0.0125	0.013	0.0105	0.011	0.011	0.01
3.25	0.011	0.0115	0.0105	0.0125	0.013	0.011	0.0135	0.0145	0.013	0.013	0.013	0.0115	0.014	0.015	0.012	0.012	0.0125	0.0115
3.5	0.012	0.0125	0.0115	0.0135	0.0145	0.012	0.015	0.016	0.014	0.014	0.014	0.0125	0.015	0.016	0.013	0.013	0.014	0.012
3.75	0.0135	0.014	0.013	0.015	0.016	0.0135	0.017	0.0185	0.016	0.0155	0.0155	0.0145	0.017	0.018	0.015	0.015	0.015	0.014
4	0.015	0.0155	0.0145	0.0165	0.0175	0.015	0.019	0.0205	0.018	0.017	0.0175	0.0155	0.0185	0.0195	0.016	0.016	0.0165	0.015
4.25	0.0165	0.017	0.016	0.018	0.0185	0.0165	0.021	0.0225	0.02	0.0185	0.019	0.0175	0.02	0.0215	0.0175	0.018	0.018	0.017
4.5	0.018	0.0185	0.018	0.02	0.0205	0.0175	0.023	0.0245	0.0225	0.02	0.021	0.0185	0.022	0.023	0.019	0.019	0.019	0.018
4.75	0.02	0.021	0.0195	0.021	0.0225	0.02	0.0255	0.0275	0.0245	0.022	0.0225	0.0205	0.024	0.0255	0.021	0.021	0.021	0.02
5	0.0225	0.023	0.0215	0.0235	0.0245	0.0215	0.0285	0.03	0.0265	0.024	0.025	0.0225	0.0265	0.0275	0.0235	0.023	0.023	0.021
5.25	0.025	0.0255	0.0245	0.0255	0.027	0.024	0.031	0.033	0.03	0.0265	0.0275	0.025	0.029	0.0305	0.0255	0.025	0.025	0.0235
5.5	0.0275	0.0285	0.0265	0.0285	0.029	0.0265	0.034	0.036	0.033	0.0285	0.0295	0.0275	0.032	0.033	0.028	0.027	0.027	0.0255
5.75	0.03	0.0315	0.0295	0.0305	0.032	0.0285	0.0375	0.0395	0.036	0.031	0.0325	0.0295	0.0345	0.0355	0.0305	0.0295	0.03	0.028
6	0.033	0.0345	0.0325	0.0335	0.0355	0.0315	0.041	0.0435	0.0395	0.0345	0.0355	0.0325	0.0375	0.0395	0.0335	0.032	0.0325	0.03
6.25	0.037	0.0375	0.036	0.037	0.0385	0.0345	0.045	0.0475	0.0435	0.037	0.0385	0.035	0.041	0.043	0.036	0.035	0.0355	0.033
6.5	0.041	0.0425	0.0405	0.0395	0.0425	0.0385	0.0495	0.052	0.0475	0.0405	0.0425	0.039	0.0445	0.0475	0.0395	0.038	0.0385	0.0365
6.75	0.045	0.0465	0.044	0.044	0.0465	0.042	0.0545	0.057	0.052	0.0445	0.046	0.0425	0.0485	0.052	0.043	0.042	0.0425	0.04
7	0.05	0.0515	0.049	0.048	0.051	0.046	0.0595	0.0625	0.0565	0.048	0.0505	0.046	0.053	0.056	0.0465	0.0455	0.046	0.043
7.25	0.055	0.0565	0.054	0.0525	0.0555	0.0495	0.065	0.068	0.0615	0.052	0.0545	0.0495	0.0565	0.061	0.0505	0.0495	0.05	0.047
7.5	0.061	0.0635	0.06	0.0575	0.0605	0.0545	0.0705	0.073	0.0665	0.056	0.0585	0.053	0.061	0.066	0.0545	0.053	0.055	0.051
7.75	0.0675	0.0705	0.0665	0.063	0.0655	0.0595	0.0765	0.0795	0.0725	0.0605	0.064	0.058	0.066	0.072	0.0595	0.058	0.06	0.056
8	0.074	0.077	0.0735	0.068	0.071	0.0645	0.0825	0.0855	0.078	0.065	0.068	0.062	0.071	0.077	0.0635	0.0625	0.065	0.06
8.25	0.0815	0.0845	0.0805	0.074	0.077	0.07	0.0885	0.0915	0.0845	0.07	0.0735	0.0665	0.076	0.083	0.0685	0.067	0.0705	0.065
8.5	0.088	0.092	0.0875	0.079	0.083	0.075	0.094	0.097	0.09	0.074	0.0785	0.071	0.0805	0.0885	0.0735	0.072	0.0765	0.0695
8.75	0.095	0.099	0.0945	0.0855	0.0885	0.081	0.1	0.104	0.0955	0.079	0.083	0.075	0.086	0.094	0.0785	0.077	0.082	0.075
9	0.1025	0.1075	0.102	0.0905	0.095	0.087	0.105	0.1095	0.101	0.083	0.0885	0.0795	0.0905	0.0995	0.0835	0.082	0.0875	0.08
9.25	0.1095	0.1145	0.1085	0.0965	0.101	0.0925	0.11	0.115	0.1055	0.088	0.0935	0.084	0.095	0.105	0.0885	0.087	0.093	0.085
9.5	0.1155	0.1215	0.1155	0.1025	0.108	0.098	0.1135	0.12	0.1095	0.092	0.0985	0.088	0.099	0.1095	0.0925	0.091	0.098	0.09
9.75	0.122	0.128	0.1215	0.1075	0.115	0.104	0.1175	0.125	0.1135	0.096	0.104	0.092	0.103	0.114	0.0975	0.096	0.103	0.0945
10	0.1285	0.1345	0.128	0.113	0.1205	0.1085	0.1225	0.13	0.118	0.1	0.108	0.096	0.107	0.119	0.1015	0.1	0.108	0.0985
10.25	0.1345	0.141	0.134	0.1175	0.1265	0.1135	0.126	0.1355	0.122	0.104	0.1125	0.1	0.11	0.1235	0.105	0.104	0.113	0.103
10.5	0.142	0.149	0.1415	0.1225	0.132	0.118	0.1305	0.14	0.126	0.107	0.117	0.1025	0.1145	0.128	0.1085	0.108	0.118	0.106
10.75	0.149	0.156	0.1485	0.1275	0.139	0.123	0.135	0.1445	0.1305	0.11	0.1215	0.1055	0.118	0.134	0.1125	0.1125	0.123	0.11
11	0.155	0.1635	0.155	0.1325	0.1455	0.1275	0.1395	0.1495	0.1345	0.114	0.1265	0.1095	0.122	0.139	0.116	0.1165	0.128	0.114
11.25	0.162	0.17	0.161	0.138	0.1515	0.1325	0.1445	0.1545	0.14	0.118	0.131	0.1135	0.126	0.1445	0.12	0.1215	0.1325	0.118
11.5	0.1675	0.1775	0.167	0.1425	0.158	0.137	0.149	0.1585	0.1445	0.121	0.1355	0.1165	0.13	0.1485	0.1235	0.125	0.138	0.122
11.75	0.1745	0.183	0.1735	0.1475	0.1635	0.142	0.1535	0.1635	0.1495	0.125	0.1405	0.1205	0.134	0.1535	0.1275	0.1295	0.1435	0.126
12	0.1815	0.1905	0.181	0.1525	0.1705	0.147	0.1585	0.1685	0.1545	0.129	0.1455	0.1245	0.1385	0.1585	0.1315	0.134	0.1495	0.131
12.25	0.186	0.1955	0.1855	0.1565	0.1755	0.151	0.163	0.1725	0.1595	0.133	0.15	0.1285	0.142	0.1625	0.135	0.138	0.154	0.135
12.5	0.1925	0.2025	0.191	0.1615	0.1825	0.1565	0.168	0.177	0.1645	0.137	0.1555	0.1315	0.147	0.1675	0.1395	0.143	0.1595	0.139
12.75	0.1985	0.2075	0.197	0.167	0.1885	0.1615	0.1715	0.1815	0.1695	0.141	0.16	0.136	0.1515	0.1725	0.1435	0.147	0.165	0.143
13	0.2045	0.214	0.203	0.1715	0.194	0.166	0.177	0.1855	0.1745	0.1455	0.1655	0.14	0.1555	0.1775	0.148	0.151	0.1705	0.148
13.25	0.209	0.219	0.2075	0.176	0.199	0.1705	0.181	0.1895	0.1785	0.149	0.1695	0.143	0.159	0.181	0.1525	0.1555	0.1755	0.1515
13.5	0.214	0.2245	0.213	0.1815	0.2045	0.1755	0.186	0.1935	0.183	0.153	0.1745	0.1475	0.164	0.1865	0.1565	0.1595	0.18	0.156
13.75	0.219	0.23	0.218	0.186	0.209	0.18	0.19	0.1965	0.187	0.157	0.179	0.151	0.1685	0.19	0.1605	0.1635	0.1845	0.16
14	0.223	0.234	0.222	0.1905	0.214	0.184	0.195	0.2015	0.192	0.1615	0.183	0.1555	0.1725	0.1945	0.1645	0.168	0.1895	0.164
14.25	0.2275	0.238	0.226	0.195	0.219	0.1885	0.1985	0.2045	0.196	0.1645	0.1875	0.159	0.177	0.1985	0.168	0.1715	0.1945	0.168
14.5	0.2315	0.242	0.2295	0.1985	0.223	0.1925	0.202	0.208	0.1995	0.168	0.191	0.163	0.1805	0.202	0.172	0.1755	0.199	0.1715
14.75	0.236	0.247	0.2335	0.202	0.227	0.196	0.2065	0.21	0.203	0.172	0.195	0.166	0.1835	0.2045	0.1755	0.1795	0.203	0.175
15	0.238	0.2475	0.235	0.205	0.2305	0.1995	0.209	0.2125	0.2075	0.1745	0.1985	0.169	0.1865	0.2085	0.178	0.1825	0.206	0.178
15.25	0.2425	0.252	0.2395	0.21	0.235	0.204	0.2125	0.2165	0.2115	0.1785	0.203	0.173	0.19	0.2125	0.182	0.1865	0.2105	0.1825
15.5	0.245	0.2555	0.2425	0.213	0.237	0.2075	0.216	0.2175	0.2145	0.1815	0.2055	0.176	0.193	0.2145	0.1855	0.1895	0.214	0.185
15.75	0.2465	0.258	0.2455	0.2155	0.2405	0.21	0.2185	0.22	0.217	0.185	0.209	0.1785	0.1955	0.218	0.1885	0.1925	0.217	0.1885
16	0.25	0.2615	0.2475	0.22	0.2435	0.2135	0.222	0.2225	0.22	0.1875	0.2125	0.1815	0.1985	0.221	0.1915	0.1965	0.222	0.1925
16.25	0.2525	0.2645	0.25	0.222	0.247	0.2165	0.2235	0.2245	0.222	0.1895	0.2155	0.1845	0.2015	0.224	0.1945	0.1995	0.2245	0.1955
16.5	0.256	0.268	0.2545	0.224	0.2485	0.2185	0.2265	0.227	0.2255	0.1925	0.2185	0.188	0.204	0.2255	0.197	0.2025	0.2275	0.198
16.75	0.2585	0.2715	0.257	0.226	0.251	0.2205	0.228	0.229	0.2275	0.1955	0.2215	0.1905	0.206	0.227	0.1995	0.205	0.229	0.2
17	0.261	0.275	0.26	0.229	0.254	0.2225	0.2305	0.231	0.23	0.1985	0.2245	0.1935	0.2085	0.2305	0.2025	0.2075	0.2335	0.203
17.25	0.264	0.2805	0.2635	0.231	0.257	0.225	0.2335	0.234	0.233	0.201	0.2275	0.1965	0.2125	0.2325	0.205	0.21	0.2365	0.2055
17.5	0.268	0.283	0.2665	0.232	0.259	0.2275	0.234	0.237	0.233	0.203	0.229	0.198	0.2145	0.2345	0.206	0.2125	0.2395	0.208
17.75	0.271	0.2865	0.27	0.235	0.2615	0.2295	0.2365	0.24	0.236	0.206	0.232	0.2005	0.216	0.2365	0.208	0.216	0.242	0.211
18	0.275	0.2905	0.2735	0.236	0.264	0.2315	0.238	0.2425	0.2375	0.2085	0.2345	0.2025	0.218	0.238	0.21	0.2175	0.2455	0.212
18.25	0.2785	0.293	0.2775	0.238	0.2665	0.232	0.239	0.244	0.2385	0.209	0.2375	0.2035	0.219	0.2405	0.212	0.2195	0.2475	0.2145
18.5	0.283	0.2975	0.2815	0.2405	0.27	0.2345	0.242	0.2475	0.2405	0.211	0.2395	0.206	0.2205	0.2435	0.2145	0.2225	0.2515	0.2175
18.75	0.2855	0.3005	0.284	0.2425	0.273	0.237	0.244	0.25	0.243	0.2135	0.242	0.208	0.2215	0.2455	0.216	0.225	0.255	0.22
19	0.288	0.304	0.286	0.2445	0.2755	0.239	0.246	0.252	0.244	0.215	0.244	0.21	0.2235	0.2485	0.218	0.2275	0.2575	0.2225
19.25	0.2925	0.3065	0.291	0.246	0.2785	0.241	0.247	0.254	0.2465	0.217	0.2475	0.2115	0.224	0.251	0.2195	0.2295	0.2605	0.2235
19.5	0.2965	0.311	0.295	0.249	0.2815	0.243	0.25	0.257	0.2495	0.2205	0.2505	0.215	0.227	0.2535	0.2225	0.2325	0.2635	0.228
19.75	0.299	0.314	0.2965	0.251	0.2845	0.245	0.252	0.2595	0.2515	0.222	0.2535	0.217	0.2295	0.2565	0.2245	0.2345	0.2675	0.23
20	0.303	0.318	0.3005	0.254	0.288	0.249	0.2545	0.2625	0.2535	0.224	0.2555	0.219	0.231	0.259	0.2255	0.2365	0.27	0.2325
20.25	0.3055	0.3215	0.304	0.256	0.29	0.251	0.2565	0.2635	0.255	0.226	0.2585	0.2215	0.2325	0.2615	0.2275	0.238	0.2725	0.2335
20.5	0.31	0.3255	0.3075	0.259	0.293	0.2525	0.259	0.267	0.2565	0.228	0.2615	0.2235	0.235	0.265	0.2295	0.241	0.276	0.237
20.75	0.3125	0.329	0.3095	0.261	0.2965	0.2555	0.2605	0.27	0.2565	0.2305	0.264	0.2265	0.237	0.267	0.231	0.2425	0.2785	0.2375
21	0.316	0.332	0.314	0.264	0.299	0.2585	0.2635	0.273	0.258	0.2345	0.267	0.2285	0.24	0.2695	0.2335	0.2455	0.2815	0.2405
21.25	0.319	0.3355	0.3175	0.267	0.3015	0.261	0.266	0.274	0.262	0.2375	0.2685	0.2315	0.243	0.2725	0.2375	0.2485	0.284	0.243
21.5	0.321	0.337	0.3195	0.27	0.304	0.2645	0.269	0.2755	0.2655	0.239	0.272	0.234	0.245	0.2745	0.24	0.2515	0.287	0.247
21.75	0.324	0.3415	0.322	0.2725	0.307	0.2675	0.2705	0.278	0.2655	0.2405	0.2745	0.236	0.2465	0.2775	0.242	0.254	0.2905	0.2485
22	0.327	0.345	0.3255	0.2745	0.31	0.2695	0.273	0.28	0.2655	0.241	0.277	0.238	0.248	0.2805	0.244	0.256	0.293	0.2515
22.25	0.329	0.346	0.328	0.2765	0.312	0.2715	0.2745	0.2805	0.267	0.2435	0.2795	0.239	0.25	0.282	0.2455	0.2575	0.2945	0.253
22.5	0.333	0.35	0.333	0.2795	0.316	0.2745	0.277	0.2835	0.2685	0.2455	0.282	0.242	0.253	0.285	0.248	0.2605	0.298	0.256
22.75	0.3365	0.354	0.3355	0.2815	0.3185	0.277	0.279	0.286	0.2705	0.248	0.2845	0.244	0.2555	0.2875	0.2495	0.2615	0.3	0.2575
23	0.3405	0.357	0.338	0.284	0.321	0.279	0.282	0.2885	0.2725	0.2515	0.287	0.245	0.2575	0.29	0.2515	0.264	0.303	0.26
23.25	0.3445	0.361	0.342	0.2865	0.3235	0.281	0.2835	0.2905	0.2735	0.253	0.29	0.247	0.2605	0.2925	0.254	0.266	0.3055	0.262
23.5	0.3475	0.3645	0.345	0.289	0.326	0.2835	0.286	0.294	0.276	0.2545	0.2925	0.2495	0.2625	0.295	0.257	0.2685	0.3085	0.2645
23.75	0.3505	0.368	0.3485	0.292	0.3295	0.2865	0.2885	0.298	0.2785	0.2575	0.296	0.2525	0.2655	0.298	0.26	0.2715	0.3105	0.267
24	0.3545	0.3735	0.3515	0.293	0.3325	0.2875	0.2905	0.2995	0.2805	0.2595	0.298	0.254	0.267	0.3005	0.2605	0.273	0.3135	0.269
24.25	0.3555	0.3755	0.354	0.2965	0.335	0.29	0.2925	0.301	0.282	0.263	0.3005	0.256	0.2695	0.303	0.2625	0.2745	0.316	0.27
24.5	0.359	0.3775	0.357	0.2975	0.337	0.291	0.2935	0.304	0.2815	0.265	0.3025	0.259	0.2715	0.305	0.2655	0.2755	0.318	0.272
24.75	0.3625	0.38	0.3615	0.3005	0.339	0.2935	0.298	0.3065	0.2865	0.2675	0.306	0.262	0.275	0.3085	0.268	0.278	0.3205	0.2745
25	0.366	0.385	0.3645	0.3035	0.3435	0.296	0.2995	0.309	0.289	0.27	0.3085	0.264	0.277	0.311	0.2705	0.28	0.323	0.277
25.25	0.371	0.3895	0.3695	0.306	0.3455	0.2995	0.3025	0.313	0.2905	0.2735	0.312	0.2665	0.2805	0.315	0.274	0.282	0.328	0.279
25.5	0.373	0.394	0.3705	0.3085	0.3485	0.3015	0.304	0.315	0.291	0.2755	0.3145	0.269	0.2825	0.3165	0.276	0.284	0.3295	0.281
25.75	0.375	0.3945	0.374	0.309	0.3505	0.3025	0.3065	0.3155	0.296	0.278	0.3165	0.271	0.285	0.319	0.278	0.2855	0.331	0.282
26	0.3785	0.398	0.377	0.312	0.3535	0.305	0.31	0.3185	0.298	0.2795	0.3205	0.2725	0.286	0.3225	0.28	0.2885	0.334	0.285
26.25	0.382	0.403	0.38	0.315	0.3565	0.308	0.3135	0.321	0.2995	0.2815	0.323	0.275	0.289	0.325	0.2825	0.29	0.338	0.2875
26.5	0.384	0.4045	0.382	0.3165	0.3585	0.309	0.3125	0.3245	0.299	0.2835	0.324	0.277	0.291	0.3275	0.284	0.2905	0.34	0.288
26.75	0.3885	0.409	0.386	0.319	0.3615	0.312	0.317	0.328	0.3025	0.2875	0.3285	0.281	0.294	0.3305	0.2875	0.2945	0.3425	0.2915
27	0.3915	0.412	0.39	0.322	0.3635	0.315	0.32	0.331	0.306	0.2895	0.331	0.283	0.297	0.334	0.2905	0.2965	0.346	0.293
27.25	0.3945	0.416	0.392	0.324	0.3675	0.317	0.3225	0.3335	0.3075	0.2915	0.334	0.2845	0.299	0.3365	0.292	0.2985	0.3495	0.295
27.5	0.398	0.4215	0.3955	0.326	0.371	0.319	0.324	0.337	0.308	0.293	0.3375	0.287	0.3015	0.34	0.2945	0.3005	0.352	0.2975
27.75	0.4015	0.4235	0.398	0.3275	0.3725	0.3215	0.327	0.339	0.31	0.296	0.339	0.289	0.3045	0.3425	0.297	0.3025	0.354	0.299
28	0.4055	0.4275	0.403	0.331	0.3755	0.324	0.331	0.3445	0.3155	0.298	0.343	0.292	0.3075	0.3455	0.2995	0.306	0.357	0.303

## Sheet: H2O2 10mM
Timepoint (hour)	WT			ΔrhlB (Δyptb0165)			ΔcsdA (Δyptb0486)			ΔrhlE (Δyptb1214)			ΔdbpA (Δyptb1652)			ΔsrmB (Δyptb2900)
	OD600 (median)	OD600 (max)	OD600 (min)	OD600 (median)	OD600 (max)	OD600 (min)	OD600 (median)	OD600 (max)	OD600 (min)	OD600 (median)	OD600 (max)	OD600 (min)	OD600 (median)	OD600 (max)	OD600 (min)	OD600 (median)	OD600 (max)	OD600 (min)
0	0	0.00233333	-0.000333333	0.000333333	0.012	0.000333333	0.000333333	0.0146667	-0.000333333	0.00167	0.00200333	0.00067	0.00633333	0.008	0.000333333	0.00167	0.00200333	0.00067
0.25	0.000333333	0.002	0	0.000666667	0.0126667	0.000333333	0.00166667	0.018	0.00133333	0.00167	0.00167	0.00067	0.009	0.00933333	0.001	0.00266333	0.00333	0.000663333
0.5	0.000333333	0.002	-0.000333333	0.00133333	0.0163333	0.000333333	0.003	0.0216667	0.001	0.00067	0.00200333	0.000336667	0.01067	0.0113367	0.000336667	0.00167	0.00233667	0.00100333
0.75	0	0.001	0	0.00133	0.0169967	0.00033	0	0.0203333	0	0.00167	0.00233667	0.000336667	0.01167	0.01467	0.00133667	0.00167	0.00267	0.00133667
1	0.002	0.00233333	0.000666667	0.00133	0.0169967	0.00033	0.00133333	0.0236667	0.000666667	0.00167	0.00233667	0.000336667	0.0143367	0.0150033	0.00100333	0.00133667	0.00367	0.00067
1.25	0.00133333	0.00233333	0.000666667	0.00167	0.0210033	0.00133667	0.002	0.0246667	0	0.00200333	0.00200333	0.00067	0.0120033	0.02067	0.00133667	0.00200333	0.00233667	0.00133667
1.5	0	0.000666667	-0.000333333	0.00133667	0.0180033	0.00067	0.00266667	0.0256667	0.001	0.000996667	0.00266333	0.00033	0.0163367	0.0183367	0.00167	0.00133667	0.00200333	0.000336667
1.75	0.000333333	0.00266667	0.000333333	0.00100333	0.0183367	0.000336667	0.00166667	0.027	0.00166667	0.000663333	0.00199667	0.000663333	0.01767	0.0193367	0.00133667	0.00100333	0.00133667	3.33333e-06
2	0.000666667	0.00166667	0	0.00067	0.0220033	0.000336667	0.001	0.0273333	0.000333333	0.00133667	0.00167	0.000336667	0.01367	0.02067	0.00167	0.00167	0.00233667	0.00067
2.25	0.000333333	0.001	0	0.00233667	0.01967	0.000336667	0.002	0.0293333	0.001	0.000336667	0.00133667	3.33333e-06	0.01767	0.0180033	0.00067	0.00300333	0.00467	0.00267
2.5	0.000666667	0.00266667	0.000666667	0.00166667	0.0233333	0.000333333	0.00233333	0.0296667	0.001	0.000336667	0.00167	3.33333e-06	0.0133367	0.0210033	3.33333e-06	0.00133667	0.00167	0.000336667
2.75	0.001	0.001	0	0.000666667	0.0206667	0.000333333	0.003	0.031	0.002	0.00100333	0.00167	0.00067	0.01967	0.0220033	0.00100333	0.00300333	0.00333667	0.00267
3	0.00366667	0.00433333	0.003	0.00466333	0.0216633	0.00033	0.00366667	0.031	0.00166667	0.00133667	0.00267	0.00100333	0.0203367	0.02167	0.00133667	0.00200333	0.00200333	0.00100333
3.25	0.00166667	0.00333333	0.00133333	0.000663333	0.01933	0.00033	0.00233333	0.0303333	0.00233333	0.000336667	0.00100333	0.000336667	0.01967	0.0203367	0.000336667	0.00133667	0.00200333	0.000336667
3.5	0.00233333	0.00333333	0	0.000663333	0.0229967	0.000663333	0.002	0.0313333	0.000333333	0.000996667	0.00133	0.00033	0.0193367	0.0223367	-0.00033	0.00067	0.00400333	0.00067
3.75	0.00133333	0.00166667	-0.000333333	0.00200033	0.017667	0.000667	0.00466667	0.0353333	0.002	0.00299667	0.00299667	0.000663333	0.0190033	0.0250033	0.000336667	0.00767	0.00900333	0.00600333
4	0.000666667	0.00266667	0.000666667	0.000996667	0.02233	0.00033	0.004	0.034	0.00266667	0.00399667	0.00633	0.00033	0.0210033	0.0230033	0.00367	0.00200333	0.00233667	3.33333e-06
4.25	0.00633333	0.00866667	0.003	0.00333667	0.0253367	0.000336667	0.00166667	0.029	0.001	0.00200333	0.00200333	3.33333e-06	0.0219967	0.02333	0.00033	0.00133667	0.00200333	0.00133667
4.5	0.002	0.006	0.00033333	0.00166667	0.0236667	0.000333333	0.002	0.0313333	0.00133333	0.00366667	0.004	0.000333333	0.01867	0.02467	0.00067	0.00133667	0.00300333	-0.00033
4.75	0.00133333	0.002	0.000333333	0.00433333	0.0233333	0.000333333	0.00266667	0.0326667	0.000666667	0.002	0.00266667	7.37257e-18	0.0230033	0.0263367	0.00567	0.00467	0.00567	0.00100333
5	0.00166667	0.002	0.000666667	0.00166667	0.0206667	0.000333333	0.003	0.032	0.00166667	0.00100333	0.00133667	0.000336667	0.02167	0.0220033	0.00067	0.00100333	0.00133667	0.000336667
5.25	0.00133333	0.00166667	0.000333333	0.001	0.023	0.000333333	0.00466667	0.033	0.00233333	0.00167	0.00367	0.00067	0.02167	0.0233367	0.00100333	0.00433	0.00499667	0.00033
5.5	0.00166667	0.002	0.001	0.00233333	0.0226667	0.000333333	0.00266667	0.0283333	0.000566667	0.00533	0.00566333	0.00033	0.0203367	0.0210033	0.00067	0.00200333	0.00200333	0.000336667
5.75	0.00533333	0.00733333	0.004	0.00533667	0.02667	0.00100333	0.00266667	0.0313333	0.00233333	0.00100333	0.00267	0.000336667	0.0193367	0.0260033	3.33333e-06	0.00467	0.00967	0.000336667
6	0.00266667	0.004	0.00133333	0.00133333	0.024	0.000333333	0.00266667	0.0343333	0.00266667	0.00067	0.00167	0.000336667	0.01867	0.0220033	0.000336667	0.00333667	0.00367	0.00167
6.25	0.000333333	0.00133333	0	0.00067	0.02267	0.000336667	0.005	0.0346667	0.00233333	0.00233667	0.00300333	0.00133667	0.01867	0.0230033	0.00167	0.00333667	0.00333667	0.00167
6.5	0.002	0.004	0	0.00067	0.0230033	0.000336667	0.004	0.0363333	0.00333333	0.00267	0.00333667	0.00067	0.0173367	0.0270033	0.00100333	0.00233667	0.00300333	0.00233667
6.75	0.00233333	0.00433333	0.002	0.00333667	0.0210033	0.000336667	0.00266667	0.0353333	0.00233333	0.00133667	0.00133667	0.00100333	0.0233367	0.02467	0.00100333	0.00233667	0.00333667	0.00133667
7	0.00133333	0.00333333	0.000666667	0.00100333	0.02267	0.000336667	0.00266667	0.0306667	0.000666667	0.000336667	0.00133667	3.33333e-06	0.0210033	0.0230033	0.00167	0.00167	0.00267	0.00167
7.25	0.001	0.00133333	0.001	0.00133	0.0219967	0.00033	0.004	0.034	0.00333333	0.00300333	0.00367	0.00300333	0.0230033	0.0240033	0.00100333	0.00100333	0.00333667	3.33333e-06
7.5	0.00200333	0.00200333	0.000336667	0.000666667	0.022	0.000333333	0.00533333	0.0356667	0.00266667	0.00067	0.00167	0.00067	0.0223367	0.02467	0.00200333	0.00167	0.00233667	3.33333e-06
7.75	0.00167	0.00200333	0.000336667	0.00166333	0.0226633	0.00033	0.00433333	0.0343333	0.00166667	0.00133667	0.00167	0.00067	0.02467	0.0250033	0.00300333	0.00333667	0.00433667	0.00300333
8	0.000333333	0.000666667	-0.000333333	0.00133667	0.0223367	0.00100333	0.00466667	0.0333333	0.003	0.00067	0.00233667	0.000336667	0.02067	0.02367	0.00067	0.00100333	0.00133667	3.33333e-06
8.25	0.00133333	0.00166667	0.000333333	0.000996667	0.0236633	0.00033	0.004	0.0346667	0.00133333	0.00200333	0.00267	0.000336667	0.0200033	0.02767	0.00300333	0.00467	0.00567	0.00300333
8.5	0.000333333	0.001	0	0.000663333	0.02233	0.00033	0.00366667	0.0333333	0.00166667	0.000663333	0.00299667	0.00033	0.01967	0.0250033	0.00133667	0.00333667	0.00367	0.00200333
8.75	0.00133333	0.00166667	0.001	0.00133	0.0226633	0.000663333	0.00266667	0.033	0.001	0.00067	0.00133667	3.33333e-06	0.02167	0.0263367	0.00067	0.00300333	0.00367	0.00167
9	0.00133667	0.00300333	0.000336667	0.00166333	0.0229967	0.000663333	0.004	0.0336667	0.003	3.33333e-06	0.00133667	3.33333e-06	0.0220033	0.0233367	0.00133667	0.00167	0.00267	3.33333e-06
9.25	0.000666667	0.00233333	0.000333333	0.000666667	0.0233333	0.000666667	0.00466667	0.0343333	0.00166667	0.00100333	0.00200333	0.00067	0.0203367	0.02467	0.00100333	0.00233667	0.00300333	0.00200333
9.5	0.00133333	0.004	0.00133333	0.000336667	0.0213367	0.000336667	0.00333333	0.035	0.002	0.00200333	0.00200333	0.00067	0.02167	0.02667	0.00267	0.00367	0.00500333	0.00267
9.75	0.002	0.002	0.000333333	0.00067	0.02167	0.000336667	0.00366667	0.035	0.00366667	0.00200333	0.00233667	0.00167	0.0210033	0.02467	0.00200333	0.00200333	0.00200333	0.00133667
10	0.000333333	0.00166667	0	0.00133	0.0226633	0.000663333	0.00433333	0.034	0.00166667	0.00100333	0.00167	0.000336667	0.02267	0.02467	0.00100333	0.00133667	0.00200333	0.00100333
10.25	0.000666667	0.00333333	0.000666667	0.001	0.0243333	0.000333333	0.005	0.0363333	0.003	0.00167	0.00267	0.00133667	0.02267	0.0253367	0.00300333	0.00367	0.00433667	0.00300333
10.5	0.00133333	0.00233333	0.000333333	0.00299667	0.02233	0.000663333	0.00366667	0.034	0.00166667	0.00100333	0.00133667	0.000336667	0.02067	0.02667	0.00167	0.00300333	0.00367	0.00200333
10.75	0.001	0.003	0.000666667	0.001	0.022	0.000666667	0.00666667	0.0356667	0.002	0.00100333	0.00200333	0.00067	0.02267	0.02267	0.00100333	0.00133667	0.00167	0.00100333
11	0.000666667	0.00233333	0	0.00233667	0.0240033	0.000336667	0.00566667	0.035	0.002	0.00200333	0.00267	0.00167	0.0213367	0.0260033	0.00200333	0.00200333	0.00300333	0.00100333
11.25	0.00100333	0.00333667	0.000336667	0.000663333	0.02333	0.00033	0.00366667	0.034	0.001	0.00167	0.00233667	0.00167	0.0213367	0.0220033	0.00133667	0.00133667	0.00167	3.33333e-06
11.5	0.00100333	0.00200333	0.000336667	0.000666667	0.0226667	0.000333333	0.00266667	0.034	0.002	0.00133667	0.00233667	0.00067	0.02167	0.0243367	0.00233667	0.00267	0.00367	0.00200333
11.75	0.00133667	0.00267	0.00067	0.00167	0.02167	0.00067	0.003	0.034	0.00166667	0.00100333	0.00267	0.00067	0.0200033	0.02267	0.00133667	0.00367	0.00367	0.00200333
12	0.000333333	0.00266667	0	0.00167	0.0223367	0.000336667	0.00233333	0.0333333	0.002	0.00267	0.00267	0.00200333	0.0210033	0.0250033	0.00200333	0.00267	0.00333667	0.00167
12.25	0.000333333	0.003	0.000333333	0.00133667	0.0220033	0.000336667	0.003	0.0326667	0.00133333	0.00167	0.00200333	0.00067	0.02067	0.02467	0.00267	0.00300333	0.00333667	0.00233667
12.5	0.000663333	0.00299667	0.00033	0.00167	0.0210033	0.000336667	0.00566667	0.0366667	0.00333333	0.000996667	0.00299667	0.00033	0.0230033	0.0243367	0.00200333	0.00167	0.00200333	0.00133667
12.75	0.00166333	0.00199667	0.00033	0.001	0.0226667	0.000333333	0.00333333	0.034	0.00233333	0.00200333	0.00267	0.00167	0.0193367	0.02167	0.00133667	0.00300333	0.00333667	0.00200333
13	0	0.00233333	-0.000333333	0.000666667	0.0216667	0.000333333	0.00466667	0.0333333	0.002	0.00333667	0.00367	0.00267	0.0220033	0.0220033	0.00100333	0.00200333	0.00267	0.00100333
13.25	0.000666667	0.00333333	0.000333333	0.00100333	0.0213367	0.000336667	0.004	0.0333333	0.00133333	0.00267	0.00300333	0.00200333	0.0203367	0.0230033	0.00100333	0.00200333	0.00200333	0.000336667
13.5	0.00166333	0.00366333	0.00033	0.00067	0.02167	0.000336667	0.00266667	0.033	0.00166667	0.00233333	0.00266667	0.002	0.0203367	0.02267	0.00133667	0.00200333	0.00267	0.00067
13.75	0.00133333	0.00266667	0.000333333	0.00100333	0.0233367	0.000336667	0.002	0.0313333	0.00133333	0.00233333	0.003	0.00166667	0.02167	0.0240033	0.00233667	0.00199667	0.00299667	0.00033
14	0.001	0.00233333	0.001	0.00200333	0.0240033	0.00133667	0.00466667	0.035	0.00133333	0.00366667	0.00366667	0.00333333	0.0190033	0.0263367	0.00167	0.00166667	0.002	0.000666667
14.25	0.00133333	0.00433333	0.001	0.00200333	0.0223367	0.00167	0.003	0.0333333	0.001	0.003	0.00433333	0.00266667	0.01967	0.02367	0.00200333	0.00266667	0.003	0.000333333
14.5	0.00133	0.00299667	0.00033	0.00133667	0.02167	0.000336667	0.00466667	0.0366667	0.00466667	0.00633333	0.00666667	0.00466667	0.02167	0.0223367	0.00133667	0.00166333	0.00266333	0.00033
14.75	0.00133333	0.002	-0.000333333	0.000996667	0.02233	0.00033	0.004	0.0336667	0.00266667	0.00733333	0.00833333	0.00633333	0.0183333	0.0233333	0.000666667	0.00167	0.00200333	0.000336667
15	0.000666667	0.002	0.000333333	0.000666667	0.022	0.000333333	0.00466667	0.0366667	0.00433333	0.00666667	0.008	0.00533333	0.0183333	0.0226667	0.000333333	0.00199667	0.00266333	0.00033
15.25	0.000333333	0.00233333	-0.000333333	0.00067	0.02167	0.000336667	0.00433333	0.0336667	0.00133333	0.00833333	0.00966667	0.00766667	0.021	0.0233333	0.000666667	0.00167	0.00200333	0.000336667
15.5	0.001	0.00333333	0.000666667	0.001	0.0223333	0.000333333	0.00366667	0.0323333	0.000666667	0.012	0.0133333	0.011	0.02	0.021	0.000333333	0.00133	0.00166333	0.00033
15.75	0.000666667	0.002	-0.000333333	0.000666667	0.0216667	0.000333333	0.004	0.034	0.00333333	0.0146667	0.016	0.0136667	0.0206667	0.021	0	0.00100333	0.00133667	3.33333e-06
16	0.000666667	0.004	0.000333333	0.000333333	0.022	0.000333333	0.00466667	0.035	0.002	0.017	0.0186667	0.0153333	0.0193333	0.0236667	0.00166667	0.00100333	0.00133667	-0.00033
16.25	0.000666667	0.00233333	-0.000333333	0.00033	0.0216633	0.00033	0.00266667	0.0336667	0.002	0.021	0.0226667	0.0186667	0.0203333	0.024	0.002	3.33333e-06	0.00200333	3.33333e-06
16.5	0.00133333	0.00333333	0.001	0.001	0.024	0.000333333	0.00433333	0.0353333	0.00333333	0.0253333	0.0273333	0.0233333	0.0213333	0.0233333	0.00233333	0.00067	0.00167	-0.00033
16.75	0.00166667	0.00266667	0.001	0.00133667	0.0213367	0.000336667	0.005	0.0343333	0.000666667	0.0303333	0.033	0.0273333	0.0233333	0.0236667	0.00233333	0.00233333	0.00266667	0.000333333
17	0.00133333	0.00266667	0.000333333	0.000666667	0.02	0	0.004	0.033	0.002	0.0386667	0.0413333	0.034	0.022	0.023	0.002	-0.00033	0.00133667	-0.00033
17.25	0.00166667	0.00333333	0.000666667	0.000666667	0.0196667	0	0.00533333	0.0346667	0.003	0.047	0.0506667	0.0413333	0.024	0.0243333	0.00366667	0.00133333	0.00266667	0.000333333
17.5	0.00266667	0.004	0.002	0.00133333	0.023	0.000666667	0.004	0.034	0.00333333	0.0553333	0.06	0.05	0.0223333	0.0256667	0.00433333	0.00233667	0.00267	0.00100333
17.75	0.00366667	0.00566667	0.00266667	0.002	0.023	0.001	0.005	0.0353333	0.003	0.0656667	0.0706667	0.0596667	0.0246667	0.028	0.00566667	0.00300333	0.00300333	0.00133667
18	0.00666667	0.00833333	0.005	0.00266667	0.022	0.00166667	0.00766667	0.0383333	0.005	0.0756667	0.081	0.0693333	0.0246667	0.0286667	0.00566667	3.33333e-06	0.00133667	-0.00033
18.25	0.00466667	0.00666667	0.00366667	0.003	0.0216667	0.002	0.00566667	0.036	0.003	0.0906667	0.0963333	0.082	0.0263333	0.029	0.00733333	0.00367	0.00400333	0.00200333
18.5	0.006	0.00666667	0.00566667	0.00366667	0.024	0.003	0.00433333	0.033	0.000333333	0.104667	0.111333	0.0956667	0.0276667	0.0296667	0.00933333	0.00133667	0.00467	0.00067
18.75	0.00733333	0.00933333	0.00666667	0.00666667	0.0266667	0.00466667	0.00766667	0.0373333	0.00333333	0.114333	0.122667	0.108333	0.0296667	0.0326667	0.011	0.00366667	0.00466667	0.002
19	0.00533333	0.00733333	0.005	0.007	0.0263333	0.006	0.00466667	0.031	0.004	0.127667	0.134667	0.121333	0.03	0.0336667	0.013	0.00233333	0.005	0.000333333
19.25	0.00866667	0.01	0.008	0.009	0.0273333	0.00833333	0.007	0.0366667	0.00566667	0.139333	0.149	0.132667	0.0366667	0.0373333	0.0166667	0.00533333	0.007	0.00433333
19.5	0.0136667	0.0146667	0.0136667	0.0116667	0.031	0.0106667	0.006	0.0376667	0.00533333	0.151	0.162333	0.145	0.038	0.04	0.0203333	0.00666667	0.00966667	0.00533333
19.75	0.016	0.0183333	0.016	0.015	0.034	0.0126667	0.007	0.038	0.00633333	0.162	0.174333	0.155667	0.0433333	0.0436667	0.0233333	0.00966667	0.012	0.00766667
20	0.0196667	0.0213333	0.0193333	0.019	0.0353333	0.016	0.0103333	0.039	0.004	0.175667	0.187	0.167333	0.05	0.0506667	0.03	0.00966667	0.0136667	0.008
20.25	0.023	0.0246667	0.023	0.0243333	0.0403333	0.0206667	0.00833333	0.039	0.007	0.187333	0.198667	0.179	0.0543333	0.0563333	0.036	0.014	0.0166667	0.0113333
20.5	0.0283333	0.03	0.028	0.0303333	0.0446667	0.0256667	0.00866667	0.0393333	0.00633333	0.198	0.208333	0.188333	0.0613333	0.0626667	0.0426667	0.015	0.0206667	0.014
20.75	0.031	0.032	0.0296667	0.0383333	0.0503333	0.0316667	0.00833333	0.0396667	0.00633333	0.204333	0.218	0.198	0.067	0.0746667	0.0526667	0.0213333	0.0256667	0.019
21	0.0413333	0.0433333	0.0403333	0.046	0.058	0.0396667	0.01	0.0423333	0.00966667	0.212333	0.226333	0.207333	0.078	0.0806667	0.0606667	0.026	0.0323333	0.0233333
21.25	0.0523333	0.054	0.0513333	0.0563333	0.0673333	0.0506667	0.0113333	0.0426667	0.01	0.221333	0.235667	0.216	0.089	0.0923333	0.0703333	0.033	0.0386667	0.028
21.5	0.062	0.063	0.0616667	0.0593333	0.0676667	0.0506667	0.011	0.042	0.00866667	0.232333	0.245	0.225333	0.103333	0.104333	0.0826667	0.038	0.0493333	0.0353333
21.75	0.0743333	0.0756667	0.0736667	0.0776667	0.0846667	0.069	0.0153333	0.0466667	0.0133333	0.238	0.254667	0.235333	0.112667	0.116667	0.0936667	0.0496667	0.058	0.0473333
22	0.0856667	0.0883333	0.0856667	0.0893333	0.095	0.0796667	0.0153333	0.049	0.0143333	0.247333	0.263333	0.243333	0.123	0.127	0.108	0.0583333	0.067	0.0553333
22.25	0.099	0.101667	0.0976667	0.102333	0.109333	0.0926667	0.0146667	0.048	0.0133333	0.253667	0.273333	0.249	0.134	0.139	0.118333	0.0666667	0.0773333	0.064
22.5	0.112333	0.116	0.111	0.114	0.116667	0.101667	0.0173333	0.05	0.0163333	0.265	0.282333	0.258333	0.145667	0.151667	0.128667	0.0783333	0.0883333	0.0746667
22.75	0.125667	0.131	0.123667	0.127333	0.128667	0.116333	0.0203333	0.0536667	0.018	0.272	0.288333	0.265	0.157667	0.161667	0.137333	0.088	0.0993333	0.0846667
23	0.136667	0.145	0.136667	0.137667	0.138333	0.126667	0.021	0.053	0.0176667	0.28	0.296667	0.273667	0.169667	0.172333	0.149333	0.101667	0.112333	0.0976667
23.25	0.152	0.161	0.150667	0.147333	0.147333	0.137667	0.0226667	0.0573333	0.0216667	0.289333	0.306	0.279667	0.18	0.183333	0.159	0.112667	0.123667	0.110333
23.5	0.161667	0.172	0.160667	0.161	0.161667	0.150333	0.0243333	0.061	0.0243333	0.294	0.313667	0.287667	0.190333	0.193333	0.169667	0.124	0.134333	0.121333
23.75	0.173667	0.187333	0.173	0.171333	0.171667	0.161	0.0286667	0.065	0.028	0.300667	0.322333	0.294667	0.197667	0.200333	0.178	0.134333	0.145	0.131
24	0.184667	0.197667	0.182667	0.181	0.181333	0.171667	0.0346667	0.072	0.0323333	0.309	0.329667	0.304333	0.209	0.213333	0.186333	0.147	0.156	0.143333
24.25	0.194333	0.208667	0.193	0.188667	0.189333	0.181333	0.039	0.0756667	0.0366667	0.316	0.338	0.311	0.22	0.222333	0.197333	0.157667	0.165	0.154
24.5	0.205667	0.221667	0.204333	0.199667	0.2	0.193	0.0433333	0.08	0.0423333	0.326	0.345	0.319667	0.228667	0.229667	0.206333	0.169	0.175333	0.164333
24.75	0.215	0.232667	0.215	0.207	0.207667	0.201	0.0473333	0.0856667	0.046	0.330333	0.351	0.327	0.237	0.238	0.215	0.175667	0.185667	0.173
25	0.224	0.242	0.223667	0.215	0.215	0.210667	0.0546667	0.093	0.0533333	0.34	0.363667	0.333667	0.243333	0.248667	0.223	0.19	0.195	0.185
25.25	0.234667	0.254333	0.232333	0.223	0.225	0.219	0.0633333	0.100333	0.0606667	0.347333	0.368667	0.339333	0.25	0.252667	0.230333	0.197	0.202667	0.191333
25.5	0.244	0.266667	0.244	0.231667	0.234	0.23	0.0683333	0.106333	0.0666667	0.355	0.38	0.346667	0.257	0.265667	0.239667	0.208	0.212667	0.201
25.75	0.251667	0.274667	0.251333	0.238333	0.241333	0.237333	0.0763333	0.113667	0.075	0.359333	0.386	0.354667	0.267667	0.269	0.247333	0.217333	0.221	0.209
26	0.261667	0.286333	0.261	0.246333	0.251	0.245667	0.0863333	0.121	0.0823333	0.369	0.392333	0.362667	0.274333	0.28	0.255	0.223	0.228	0.216667
26.25	0.270667	0.297667	0.268667	0.255333	0.257333	0.253	0.0923333	0.128333	0.089	0.375667	0.402333	0.370333	0.280333	0.287667	0.263333	0.231	0.236333	0.224667
26.5	0.279333	0.305333	0.279	0.263333	0.265667	0.261333	0.102333	0.138667	0.101	0.386	0.412333	0.378	0.290667	0.298	0.271	0.243333	0.245667	0.232667
26.75	0.286333	0.314	0.285667	0.271333	0.272667	0.269333	0.111	0.144333	0.105	0.389333	0.417333	0.383333	0.293	0.301667	0.275667	0.25	0.252	0.239
27	0.295333	0.323667	0.293333	0.278333	0.279667	0.274333	0.122	0.154333	0.115667	0.397	0.425	0.392	0.301667	0.310667	0.283667	0.257333	0.259667	0.246333
27.25	0.303	0.332333	0.301	0.283333	0.285	0.279667	0.126	0.158667	0.124667	0.405667	0.431	0.398	0.307333	0.317333	0.289333	0.264667	0.267667	0.253667
27.5	0.310333	0.342333	0.309	0.292	0.292667	0.286667	0.136	0.166667	0.132333	0.413	0.441	0.405	0.313	0.324667	0.297	0.275	0.276667	0.262667
27.75	0.319	0.349667	0.318333	0.299667	0.301	0.293333	0.147333	0.177333	0.144	0.421333	0.449333	0.413333	0.322333	0.336333	0.307	0.282667	0.283	0.269
28	0.326	0.36	0.325667	0.307333	0.309667	0.302667	0.153667	0.182667	0.150333	0.427	0.452	0.418667	0.327333	0.339	0.312	0.289333	0.291	0.276
28.25	0.334	0.363	0.33	0.315333	0.317333	0.309333	0.161333	0.189667	0.157	0.432333	0.459333	0.422333	0.335333	0.351	0.318333	0.296	0.297333	0.282
28.5	0.342	0.374667	0.340667	0.322667	0.322667	0.314667	0.168	0.198333	0.165667	0.439	0.466333	0.429667	0.342667	0.357	0.326667	0.304667	0.305333	0.289667
28.75	0.350667	0.383333	0.349333	0.329	0.332333	0.321333	0.174333	0.204333	0.173	0.445333	0.471	0.436667	0.35	0.364333	0.335	0.312	0.312667	0.296667
29	0.357	0.389	0.353667	0.333	0.338333	0.327333	0.181	0.211	0.180333	0.451	0.477	0.441333	0.355667	0.371	0.340667	0.317667	0.318667	0.302
29.25	0.365667	0.399	0.365	0.342667	0.346667	0.334	0.188333	0.219	0.183667	0.455333	0.483667	0.446	0.359	0.378333	0.347667	0.323667	0.325667	0.307
29.5	0.373333	0.407667	0.372333	0.350333	0.355	0.341333	0.198667	0.23	0.195667	0.462333	0.488	0.453333	0.369667	0.384667	0.354667	0.333	0.334667	0.317667
29.75	0.380667	0.415667	0.379333	0.355	0.361667	0.346333	0.203333	0.229	0.196333	0.466	0.495333	0.458333	0.373667	0.391333	0.361667	0.338333	0.34	0.323
30	0.389667	0.425667	0.388667	0.364	0.368333	0.355	0.210333	0.238333	0.203	0.470333	0.500333	0.463	0.380333	0.397667	0.369	0.347	0.349	0.330667
30.25	0.394667	0.439333	0.394667	0.369667	0.377333	0.360333	0.222667	0.244	0.209667	0.477	0.505	0.471667	0.388333	0.405333	0.375333	0.355	0.356333	0.337667
30.5	0.404667	0.441667	0.403667	0.377333	0.385667	0.37	0.231667	0.254667	0.220667	0.480667	0.51	0.473	0.392667	0.413333	0.378667	0.361	0.362	0.344
30.75	0.41	0.447667	0.409	0.383	0.391	0.372667	0.237	0.258	0.225333	0.486667	0.513	0.477667	0.399	0.417333	0.386667	0.367	0.369333	0.348333
31	0.419	0.454333	0.416667	0.389667	0.399	0.380667	0.248333	0.268	0.237	0.493	0.521333	0.483667	0.406667	0.425333	0.393	0.374	0.375333	0.356667
31.25	0.425333	0.461667	0.423333	0.396333	0.405	0.386667	0.252667	0.265	0.236333	0.496667	0.526	0.489333	0.410667	0.429	0.398333	0.38	0.382667	0.360667
31.5	0.428333	0.467	0.428333	0.401333	0.409333	0.391333	0.261333	0.276333	0.248667	0.503	0.527	0.496	0.416667	0.435333	0.406333	0.386667	0.388667	0.368
31.75	0.437333	0.474	0.435	0.408667	0.416333	0.397	0.264667	0.28	0.249333	0.508667	0.535333	0.499333	0.429	0.448667	0.412667	0.394	0.397	0.374667
32	0.444667	0.479667	0.440667	0.414333	0.424	0.401	0.27	0.281667	0.255	0.514	0.541667	0.506667	0.428	0.448333	0.417	0.400333	0.401	0.38
32.25	0.450333	0.488667	0.447	0.42	0.428	0.406667	0.279	0.289667	0.264	0.520667	0.547333	0.507333	0.434333	0.453	0.423333	0.406333	0.406667	0.387
32.5	0.456	0.491	0.453333	0.427667	0.436	0.413667	0.283	0.291333	0.268333	0.525	0.552	0.511333	0.44	0.457	0.428333	0.412333	0.413667	0.394
32.75	0.463	0.498667	0.460333	0.433667	0.443667	0.420333	0.291667	0.295667	0.273	0.532333	0.557333	0.520667	0.443	0.463667	0.433333	0.416	0.418333	0.396667
33	0.473333	0.509	0.47	0.441333	0.451667	0.427333	0.304	0.306667	0.284667	0.540667	0.567667	0.530333	0.450333	0.469333	0.439333	0.423	0.425	0.404333
33.25	0.475	0.509	0.470333	0.445	0.455	0.428667	0.310667	0.312667	0.291333	0.542333	0.573333	0.532667	0.456333	0.477	0.444667	0.428333	0.430333	0.410333
33.5	0.480667	0.517	0.476333	0.449333	0.460667	0.435333	0.316667	0.319	0.294	0.548	0.578667	0.539	0.46	0.483	0.449667	0.433667	0.434667	0.413
33.75	0.487	0.521333	0.482	0.455333	0.466	0.441333	0.323667	0.327	0.305667	0.555	0.585	0.545333	0.466333	0.488667	0.454	0.438333	0.441333	0.418333
34	0.491667	0.527	0.487	0.462	0.473333	0.448	0.331	0.334333	0.302333	0.562	0.593333	0.551667	0.470667	0.492667	0.46	0.444667	0.447667	0.424667
34.25	0.497333	0.531	0.493667	0.467	0.478667	0.451333	0.341667	0.342333	0.321333	0.568333	0.598333	0.558333	0.475	0.498667	0.464667	0.449667	0.450667	0.429
34.5	0.502333	0.536	0.497333	0.473667	0.484667	0.457667	0.344333	0.348667	0.318	0.573	0.604	0.562333	0.481	0.503333	0.471	0.455	0.455	0.432
34.75	0.507	0.54	0.502333	0.476333	0.489	0.461333	0.351	0.354333	0.326667	0.576667	0.609	0.567667	0.484	0.508	0.475667	0.46	0.461333	0.437667
35	0.514333	0.546333	0.509	0.482333	0.492667	0.464667	0.355333	0.367333	0.337667	0.584	0.613667	0.574667	0.49	0.512667	0.481667	0.464	0.464333	0.440667
35.25	0.518333	0.552333	0.514333	0.486667	0.499	0.471	0.366333	0.381667	0.347333	0.588667	0.619333	0.58	0.495667	0.517667	0.486333	0.468333	0.469333	0.445667
35.5	0.522333	0.557	0.517667	0.493	0.503	0.476667	0.371	0.385333	0.352	0.592	0.623333	0.583333	0.500333	0.522	0.491	0.472333	0.473	0.449667
35.75	0.530667	0.564667	0.525667	0.499	0.509333	0.482333	0.379667	0.398333	0.361	0.602	0.632	0.592	0.507	0.529	0.499	0.479667	0.479667	0.456667
36	0.535333	0.57	0.530333	0.503	0.513	0.485667	0.387	0.403	0.367	0.607333	0.637	0.598667	0.511333	0.535	0.505667	0.484	0.484333	0.46
36.25	0.540667	0.576667	0.537667	0.508	0.518	0.489667	0.394	0.411	0.375667	0.613667	0.642333	0.605	0.516333	0.539333	0.509667	0.486	0.487667	0.462
36.5	0.547	0.585	0.546	0.513	0.525	0.495667	0.403	0.42	0.387333	0.62	0.650333	0.611333	0.522333	0.546333	0.516	0.492	0.492333	0.468
36.75	0.552	0.587	0.549667	0.517	0.527333	0.5	0.406333	0.425333	0.395667	0.623	0.654	0.613667	0.527	0.547667	0.519	0.495667	0.497667	0.472667
37	0.559333	0.595667	0.557	0.525	0.535333	0.506333	0.419	0.438	0.404667	0.632	0.662333	0.624	0.535333	0.56	0.528333	0.504667	0.505667	0.479667
37.25	0.567333	0.603333	0.564333	0.528667	0.539	0.510333	0.425	0.444	0.41	0.636333	0.667	0.628	0.538333	0.564667	0.533667	0.508667	0.509667	0.483667
37.5	0.569667	0.608667	0.568667	0.535333	0.545	0.516	0.429	0.449	0.415	0.643	0.672333	0.634	0.546333	0.569	0.539667	0.515	0.516	0.489667
37.75	0.578667	0.614	0.576333	0.538	0.551	0.52	0.435	0.456333	0.426667	0.645333	0.676333	0.636333	0.55	0.574667	0.544	0.518667	0.519333	0.492667
38	0.584667	0.62	0.582333	0.544667	0.554	0.524333	0.444667	0.461	0.437667	0.654	0.68	0.645	0.556	0.580333	0.553333	0.524	0.524333	0.497667
38.25	0.589	0.624333	0.587667	0.547	0.558	0.528667	0.451	0.467	0.444667	0.658333	0.684667	0.649	0.561	0.591	0.559333	0.529667	0.530333	0.502667
38.5	0.594	0.632333	0.594	0.555	0.564333	0.536	0.456667	0.473	0.447	0.667	0.695333	0.656667	0.566667	0.592	0.564667	0.536667	0.537333	0.510333
38.75	0.601333	0.636667	0.599667	0.561333	0.572	0.54	0.466667	0.483667	0.457667	0.672	0.699	0.661667	0.573	0.598	0.570667	0.539667	0.541	0.513333
39	0.608333	0.641333	0.605667	0.567333	0.578	0.546667	0.466667	0.483	0.461667	0.675667	0.702667	0.667333	0.579333	0.606333	0.578333	0.544667	0.546	0.518333
39.25	0.616	0.651333	0.613333	0.576333	0.586667	0.552333	0.476	0.494	0.469	0.684	0.712333	0.675	0.585667	0.613	0.584667	0.55	0.552667	0.524667
39.5	0.622333	0.655333	0.62	0.580667	0.589333	0.557667	0.482	0.500333	0.476	0.691667	0.719	0.682333	0.592333	0.619333	0.591333	0.556333	0.560333	0.532
39.75	0.629	0.660667	0.627667	0.586333	0.596667	0.56	0.483667	0.500667	0.482333	0.694667	0.722667	0.689667	0.6	0.623667	0.597667	0.561667	0.563333	0.534333
40	0.634667	0.67	0.633	0.588	0.601667	0.569	0.490667	0.507	0.487333	0.698	0.727	0.691333	0.607	0.633667	0.603	0.567333	0.568333	0.539333
